# Supplementary material for: Theranostic imaging and multimodal photodynamic therapy and immunotherapy using the mTOR signaling pathway
Source: Springer Nature journal article supplement (doi:10.1038/s41467-023-40826-5), 2023-09-02
Supplement: MOESM1 [file 41467_2023_40826_MOESM1_ESM.pdf]

Supplementary Information:

Theranostic Imaging and Multimodal Photodynamic  
Therapy and Immunotherapy using the mTOR Signaling  
Pathway

## TABLE OF CONTENTS

|                                                                                                                                                                                                                                                                                                                              |    |
|------------------------------------------------------------------------------------------------------------------------------------------------------------------------------------------------------------------------------------------------------------------------------------------------------------------------------|----|
| Supplementary Figure 1. Synthesis of the monomer (M1)                                                                                                                                                                                                                                                                        | 5  |
| Supplementary Figure 2. Synthesis of the monomer (M2)                                                                                                                                                                                                                                                                        | 6  |
| Supplementary Figure 3. <sup>1</sup> H-NMR spectrum of ethyl ( <i>E</i> )-3-(4-(diphenylamino)phenyl)acrylate 2 in CDCl <sub>3</sub>                                                                                                                                                                                         | 7  |
| Supplementary Figure 4. <sup>1</sup> H-NMR spectra of ethyl 3-(4-(diphenylamino)phenyl)propanoate 3 in CDCl <sub>3</sub>                                                                                                                                                                                                     | 8  |
| Supplementary Figure 5. <sup>1</sup> H NMR spectra of 3-(4-(diphenylamino)phenyl)propan-1-ol 4 in CDCl <sub>3</sub>                                                                                                                                                                                                          | 9  |
| Supplementary Figure 6. <sup>1</sup> H NMR spectra of 4-(3-((tert-butyldimethylsilyl)oxy)propyl)- <i>N,N</i> -diphenylaniline 5 in CDCl <sub>3</sub>                                                                                                                                                                         | 10 |
| Supplementary Figure 7. <sup>1</sup> H NMR spectra of 4-bromo- <i>N</i> -(4-(3-((tert-butyldimethylsilyl)oxy)propyl)phenyl)- <i>N</i> -phenylaniline 6 in CDCl <sub>3</sub>                                                                                                                                                  | 11 |
| Supplementary Figure 8. <sup>1</sup> H NMR spectra of 4-(3-((tert-butyldimethylsilyl)oxy)propyl)- <i>N</i> -phenyl- <i>N</i> -(4-(4,4,5,5-tetramethyl-1,3,2-dioxaborolan-2-yl)phenyl)aniline 7 in CDCl <sub>3</sub>                                                                                                          | 12 |
| Supplementary Figure 9. Characterization of 4,4'-(6,7-bis(4-hexylphenyl)-[1,2,5]thiadiazolo[3,4- <i>g</i> ]quinoxaline-4,9-diyl)bis( <i>N</i> -(4-(3-((tert-butyldimethylsilyl)oxy)propyl)phenyl)- <i>N</i> -phenylaniline) (compound 9) by NMR in CDCl <sub>3</sub>                                                         | 13 |
| Supplementary Figure 10. MALDI-TOF spectra of 9. Matrix: alpha-cyanocinnamic acid                                                                                                                                                                                                                                            | 14 |
| Supplementary Figure 11. Characterization of 3,3'-((((6,7-bis(4-hexylphenyl)-[1,2,5]thiadiazolo[3,4- <i>g</i> ]quinoxaline-4,9-diyl)bis(4,1-phenylene))bis(phenylazanediy))bis(4,1-phenylene))bis(propan-1-ol) M1 by NMR in CDCl <sub>3</sub>                                                                                | 15 |
| Supplementary Figure 12. MALDI-TOF spectra of M1. Matrix: alpha-cyanocinnamic acid                                                                                                                                                                                                                                           | 16 |
| Supplementary Figure 13. <sup>1</sup> H-NMR spectra of 5,5-difluoro-1,3,7,9-tetramethyl-10-phenyl-5H--4λ4,5λ4-dipyrrolo[1,2- <i>c</i> :2',1'- <i>f</i> ][1,3,2]diazaborinine (12) in DMSO- <i>d</i> <sub>6</sub> .                                                                                                           | 17 |
| Supplementary Figure 14. <sup>1</sup> H-NMR spectra of 5,5-difluoro-2,8-diiodo-1,3,7,9-tetramethyl-10-phenyl-5H-4λ4,5λ4-dipyrrolo[1,2- <i>c</i> :2',1'- <i>f</i> ][1,3,2]diazaborinine (13) in DMSO- <i>d</i> <sub>6</sub> .                                                                                                 | 18 |
| Supplementary Figure 15. Characterization of 2,2'-((((1 <i>E</i> ,1' <i>E</i> )-(5,5-difluoro-2,8-diiodo-1,9-dimethyl-10-phenyl-5H-4λ4,5λ4-dipyrrolo[1,2- <i>c</i> :2',1'- <i>f</i> ][1,3,2]diazaborinine-3,7-diyl)bis(ethene-2,1-diyl))bis(4,1-phenylene))bis(oxy))bis(ethan-1-ol) M2 by NMR in DMSO- <i>d</i> <sub>6</sub> | 19 |
| Supplementary Figure 16. Synthesis and characterization of P1                                                                                                                                                                                                                                                                | 20 |
| Supplementary Figure 17. Synthesis and characterization of P2                                                                                                                                                                                                                                                                | 21 |
| Supplementary Figure 18. UV-vis absorption spectra of monomers, polymers and nanoparticles                                                                                                                                                                                                                                   | 22 |
| Supplementary Figure 19. Representative transmission electron microscope images of NP1 (P1: 0.5 mg/mL) and NP2 (P2: 0.5 mg/mL) upon addition of H <sub>2</sub> O <sub>2</sub> (10 mM)                                                                                                                                        | 23 |
| Supplementary Figure 20. Change in absorption at 410 nm corresponding to the ROS specific probe 1,3-diphenylisobenzofuran (DPBF) upon incubation of Comp-NPs and irradiation (L, 650 nm, 0.1 W cm <sup>-2</sup> , 60 J cm <sup>-2</sup> , 10 min)                                                                            | 24 |

|                                                                                                                                                                                                                                                                                                                                                                                                 |    |
|-------------------------------------------------------------------------------------------------------------------------------------------------------------------------------------------------------------------------------------------------------------------------------------------------------------------------------------------------------------------------------------------------|----|
| Supplementary Figure 21. Phosphorescence spectra of Comp-NPs encapsulated with the dye Nile Red ( $\lambda_{\text{ex}} = 550 \text{ nm}$ ) upon irradiation ( $650 \text{ nm}$ , $0.1 \text{ W cm}^{-2}$ )                                                                                                                                                                                      | 25 |
| Supplementary Table 1. Determination of the average size and polydispersity of NP1, NP2, and Comp-NPs in water                                                                                                                                                                                                                                                                                  | 26 |
| Supplementary Figure 22. The cellular uptake of Comp-NPs by 4T1 cells and 4T1 multicellular tumor spheroids                                                                                                                                                                                                                                                                                     | 27 |
| Supplementary Figure 23. ROS generation of Comp-NPs ( $0.5 \mu\text{g/mL}$ BODIPY) in 4T1 cells after various incubation times by flow cytometry                                                                                                                                                                                                                                                | 28 |
| Supplementary Figure 24. <i>In vitro</i> anticancer activity test of nanoparticles and cisplatin                                                                                                                                                                                                                                                                                                | 29 |
| Supplementary Table 2. $\text{IC}_{50}$ values of BODIPY of NP1, NP2, Comp-NPs in $\mu\text{g/mL}$ , and cisplatin (CisPt) $\mu\text{M}$ in the dark or upon irradiation ( $650 \text{ nm}$ , $0.1 \text{ W cm}^{-2}$ , $60 \text{ J cm}^{-2}$ , $10 \text{ min}$ ) in 4T1, SKOV3, A2780 and A2780DDP cells                                                                                     | 30 |
| Supplementary Figure 25. <i>In vitro</i> anticancer activity test of nanoparticles with various ratios of NP1 and NP2. Relative cell viability of 4T1 cells upon treatment with NP1, NP2, Comp-NPs with ratio of NP1 to NP2 is (a) 1:2, (b) 2:1, (c) 1:3, (d) 3:1 in the dark or upon irradiation (L, $650 \text{ nm}$ , $0.1 \text{ W cm}^{-2}$ , $60 \text{ J cm}^{-2}$ , $10 \text{ min}$ ). | 31 |
| Supplementary Table 3. $\text{IC}_{50}$ values of Comp-NPs with different ratios of NP1 and NP2 in the dark or upon irradiation ( $650 \text{ nm}$ , $0.1 \text{ W cm}^{-2}$ , $60 \text{ J cm}^{-2}$ , $10 \text{ min}$ ) in 4T1 cells.                                                                                                                                                        | 32 |
| Supplementary Figure 26. Analysis of the cell death of 4T1 cells upon treatment with NP1, NP2, and Comp-NPs, in the dark or upon irradiation (L, $650 \text{ nm}$ , $0.1 \text{ W cm}^{-2}$ , $30 \text{ J cm}^{-2}$ , $5 \text{ min}$ ).                                                                                                                                                       | 33 |
| Supplementary Figure 27. Western Blot of the caspase-3 protein expression levels in 4T1 cells after treatment with NP1, NP2, and Comp-NPs, in the dark or upon irradiation (L, $650 \text{ nm}$ , $0.1 \text{ W cm}^{-2}$ , $30 \text{ J cm}^{-2}$ , $5 \text{ min}$ ).                                                                                                                         | 34 |
| Supplementary Figure 28. Light microscopy images of 4T1 cancer cells upon incubation with phosphate-buffered saline or Comp-NPs upon irradiation (L, $650 \text{ nm}$ , $0.1 \text{ W cm}^{-2}$ , $30 \text{ J cm}^{-2}$ , $5 \text{ min}$ )                                                                                                                                                    | 35 |
| Supplementary Figure 29. CLSM images of 4T1 incubated with HMGB1 protein fluorescent probe (green) and DAPI (blue) upon various treatments                                                                                                                                                                                                                                                      | 36 |
| Supplementary Figure 30. Cell migration wound healing assay of 4T1 cells upon various treatments in the light ( $650 \text{ nm}$ , $0.1 \text{ W cm}^{-2}$ , $30 \text{ J cm}^{-2}$ , $5 \text{ min}$ ).                                                                                                                                                                                        | 37 |
| Supplementary Figure 31. Flow cytometry examination of DCs maturation upon various treatments in the dark.                                                                                                                                                                                                                                                                                      | 38 |
| Supplementary Figure 32. <i>In vivo</i> systemic toxicities study                                                                                                                                                                                                                                                                                                                               | 39 |
| Supplementary Figure 33. Semi-quantifications of mean fluorescence intensity of Figure 4B                                                                                                                                                                                                                                                                                                       | 40 |
| Supplementary Figure 34. <i>In vivo</i> anticancer efficacy on 4T1 tumor-bearing mice.                                                                                                                                                                                                                                                                                                          | 41 |
| Supplementary Figure 35. Photographs of the animals after various treatments.                                                                                                                                                                                                                                                                                                                   | 43 |
| Supplementary Figure 36. <i>In vitro</i> anticancer activity test and ICD effect of Comp-NPs on JHH7 cells.                                                                                                                                                                                                                                                                                     | 44 |
| Supplementary Figure 37. H&E staining of organs upon various treatments of HCC tumor bearing mice.                                                                                                                                                                                                                                                                                              | 45 |
| Supplementary Figure 38. Proteomic KEGG pathway enrichment analysis upon different treatments                                                                                                                                                                                                                                                                                                   | 46 |

|                                                                                                                                                                                                                                                               |    |
|---------------------------------------------------------------------------------------------------------------------------------------------------------------------------------------------------------------------------------------------------------------|----|
| Supplementary Figure 39. Western Blot of the mTOR and P70S6K protein expression levels in 4T1 cells after treatment with NP1, NP2, and Comp-NPs upon irradiation (L, 650 nm, 0.1 W cm <sup>-2</sup> , 30 J cm <sup>-2</sup> , 5 min).                         | 47 |
| Supplementary Figure 40. The gating strategies of flow cytometry analyses for CRT positive cells, Matured DCs in vitro, Matured DCs in vivo, CD3 <sup>+</sup> CD4 <sup>+</sup> CD8 <sup>+</sup> T cells, IFN- $\gamma$ <sup>+</sup> CD8 <sup>+</sup> T cells. | 48 |
| Supplementary Figure 41. The gating strategies of flow cytometry analyses for CD3 <sup>+</sup> CD8 <sup>+</sup> T cells, Cellular uptake, ROS generation, Apoptosis cells.                                                                                    | 49 |

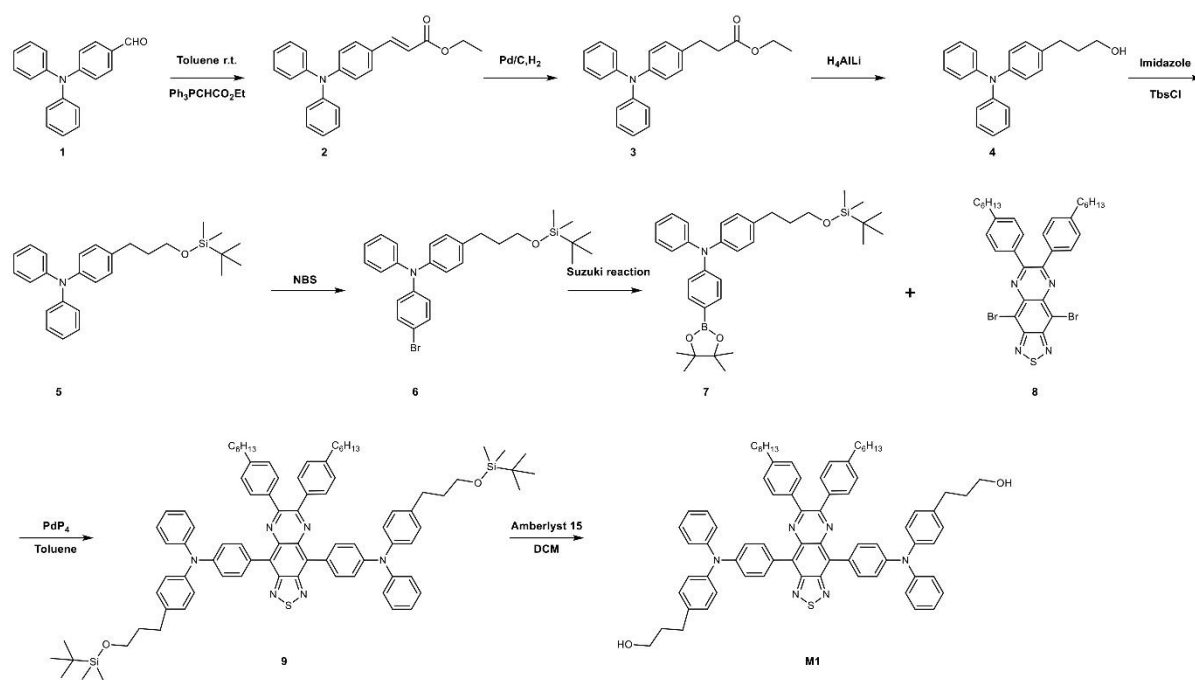

**Supplementary Figure 1.** Synthesis of the monomer (M1).

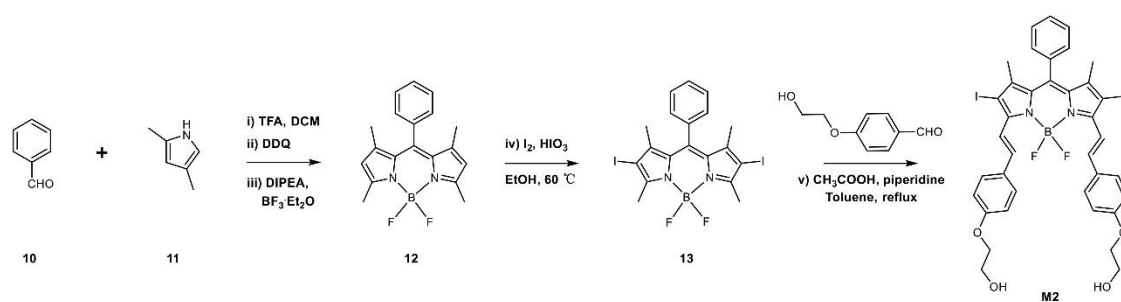

**Supplementary Figure 2.** Synthesis of the monomer (M2).

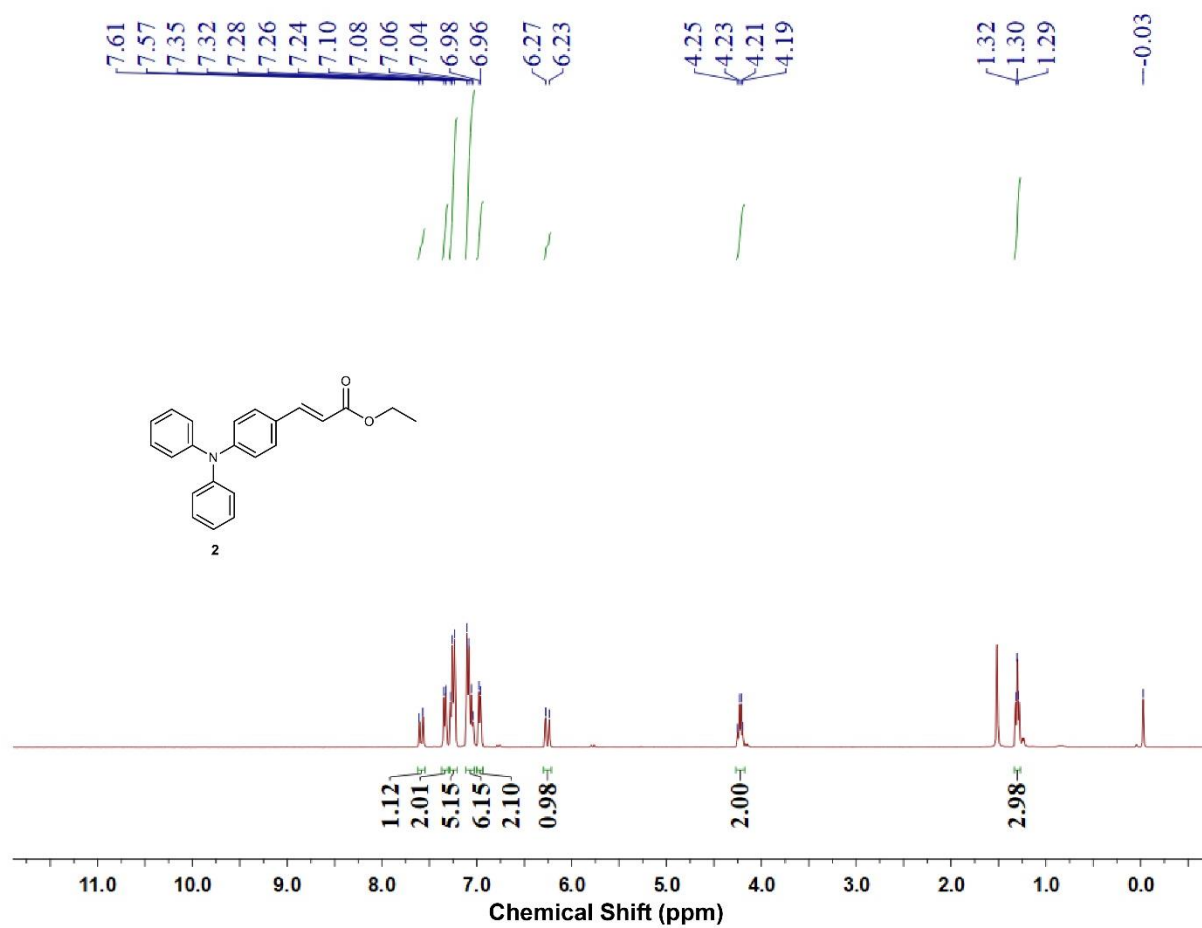

**Supplementary Figure 3.** <sup>1</sup>H-NMR spectrum of ethyl (*E*)-3-(4-(diphenylamino)phenyl)acrylate 2 in CDCl<sub>3</sub>.

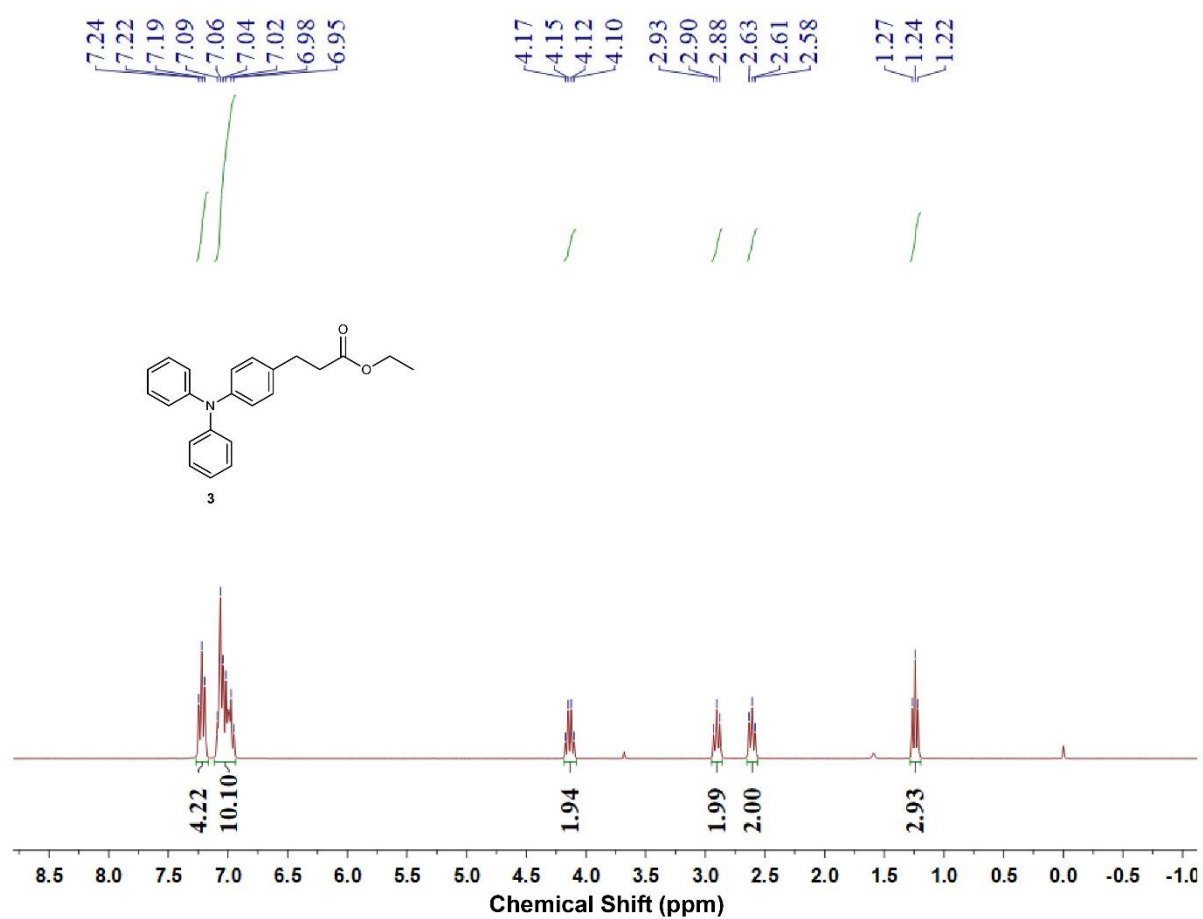

**Supplementary Figure 4.** <sup>1</sup>H-NMR spectra of ethyl 3-(4-(diphenylamino)phenyl)propanoate 3 in CDCl<sub>3</sub>.



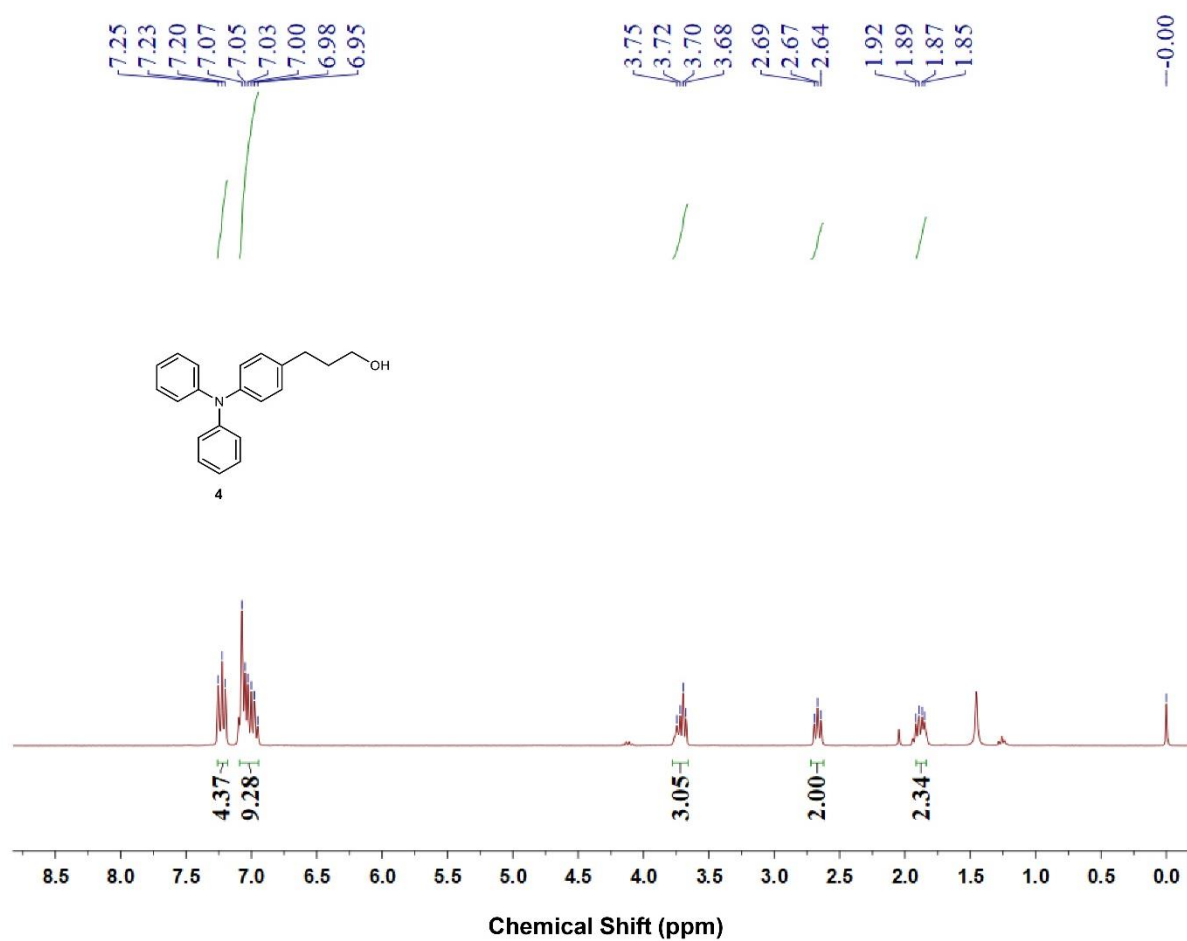

**Supplementary Figure 5.** <sup>1</sup>H-NMR spectra of 3-(4-(diphenylamino)phenyl)propan-1-ol 4 in CDCl<sub>3</sub>.

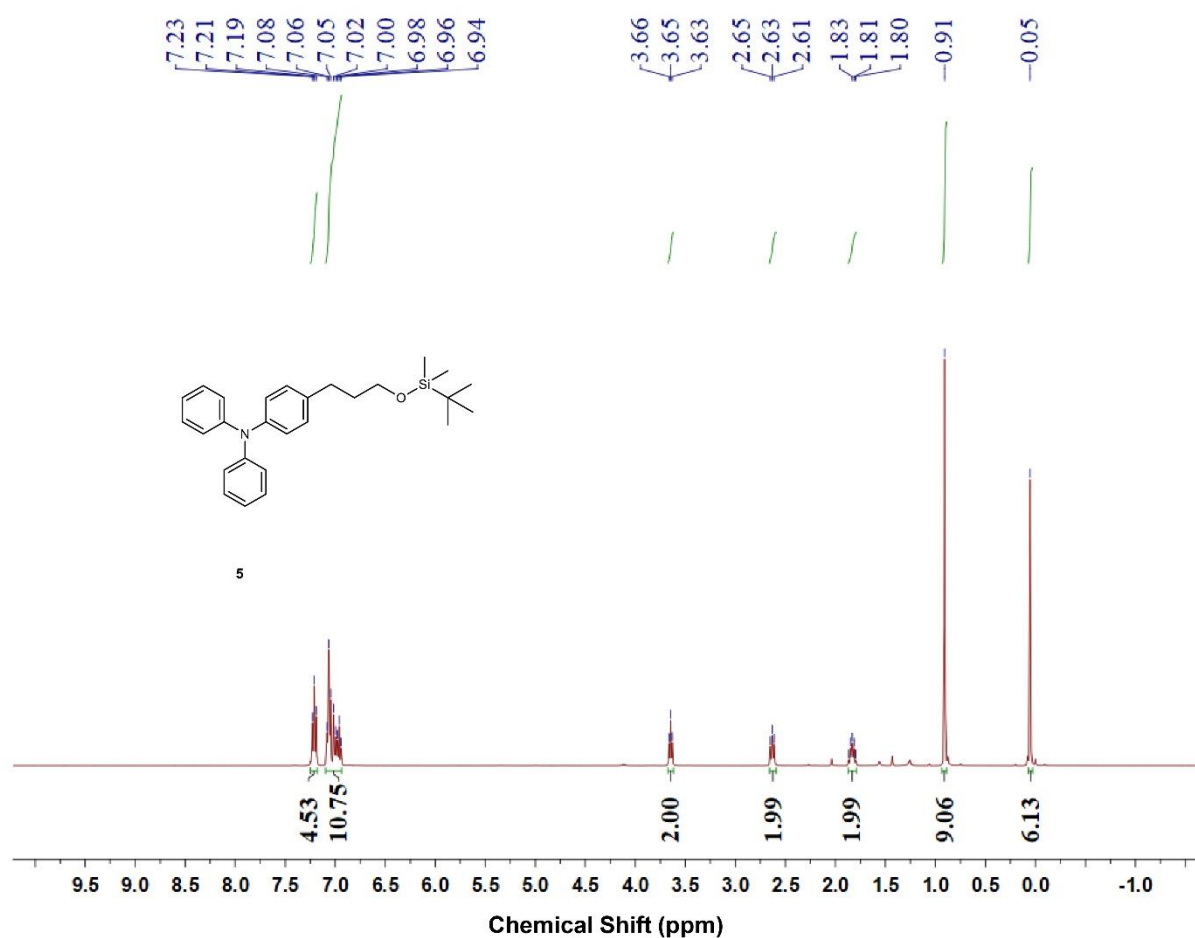

**Supplementary Figure 6.** <sup>1</sup>H-NMR spectra of 4-(3-((tert-butyldimethylsilyl)oxy)propyl)-*N,N*-diphenylaniline 5 in CDCl<sub>3</sub>.

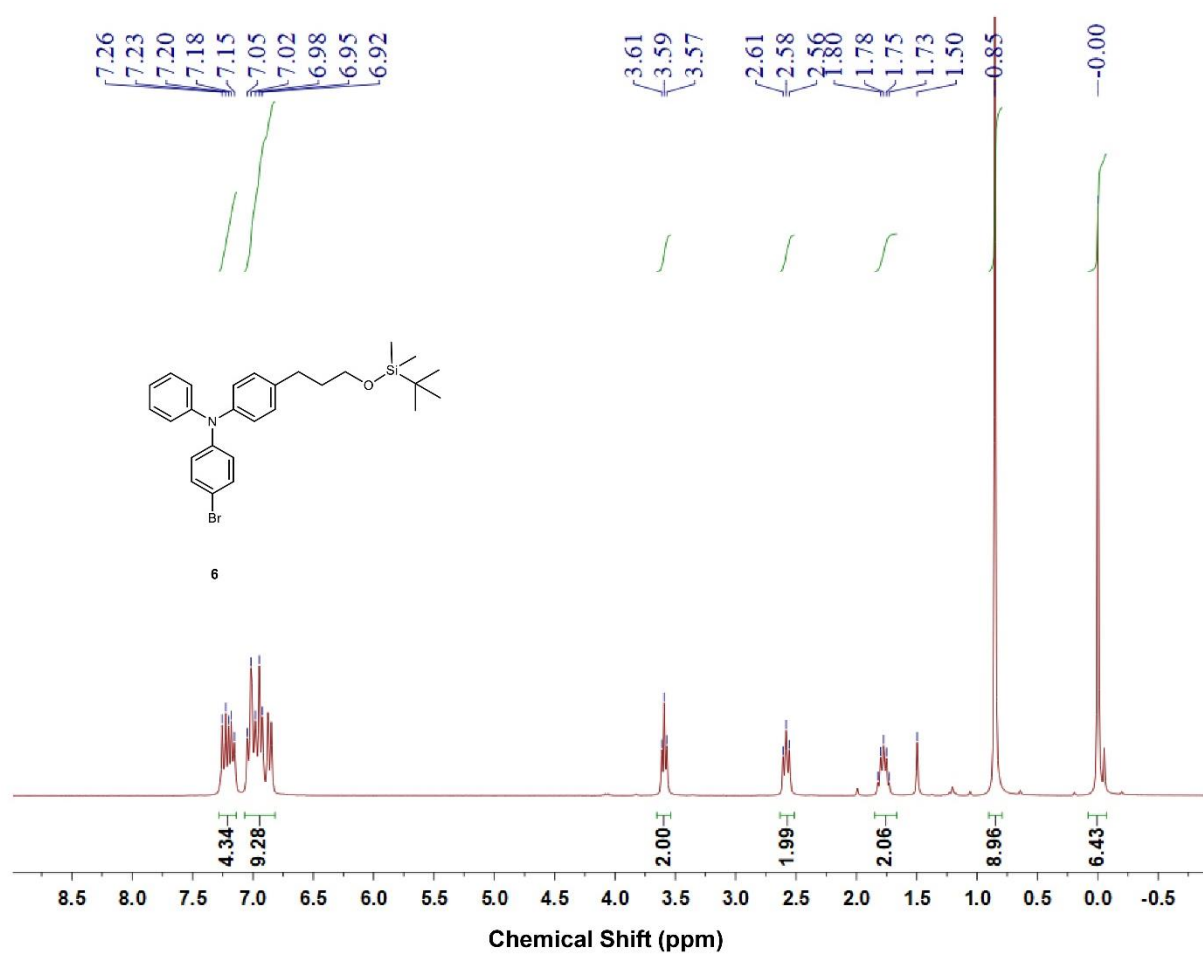

**Supplementary Figure 7.** <sup>1</sup>H-NMR spectra of 4-bromo-*N*-(4-(3-((tert-butyl)dimethylsilyl)oxy)propyl)phenyl)-*N*-phenylaniline 6 in CDCl<sub>3</sub>.

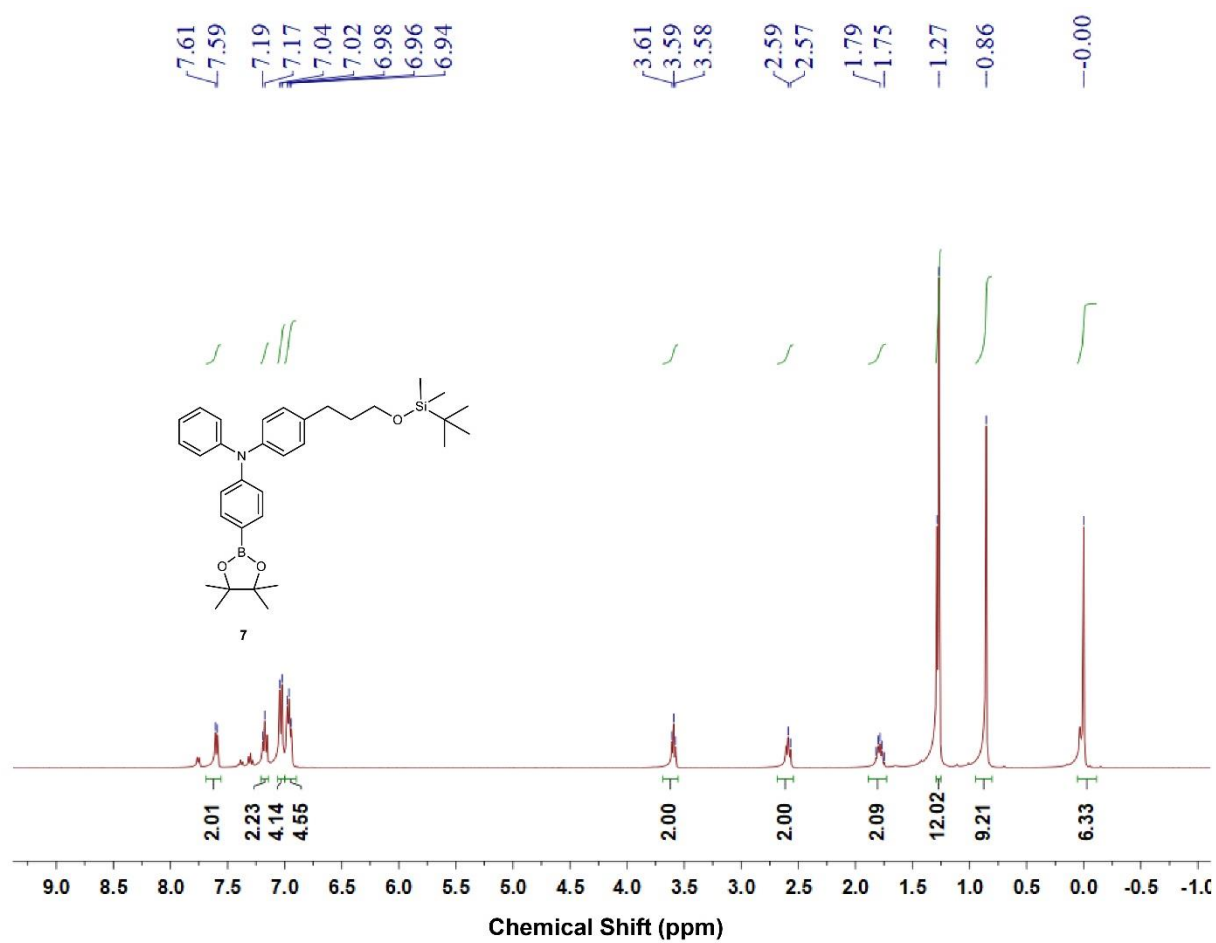

**Supplementary Figure 8.** <sup>1</sup>H-NMR spectra of 4-(3-((tert-butyldimethylsilyl)oxy)propyl)-*N*-phenyl-*N*-(4-(4,4,5,5-tetramethyl-1,3,2-dioxaborolan-2-yl)phenyl)aniline **7** in CDCl<sub>3</sub>.

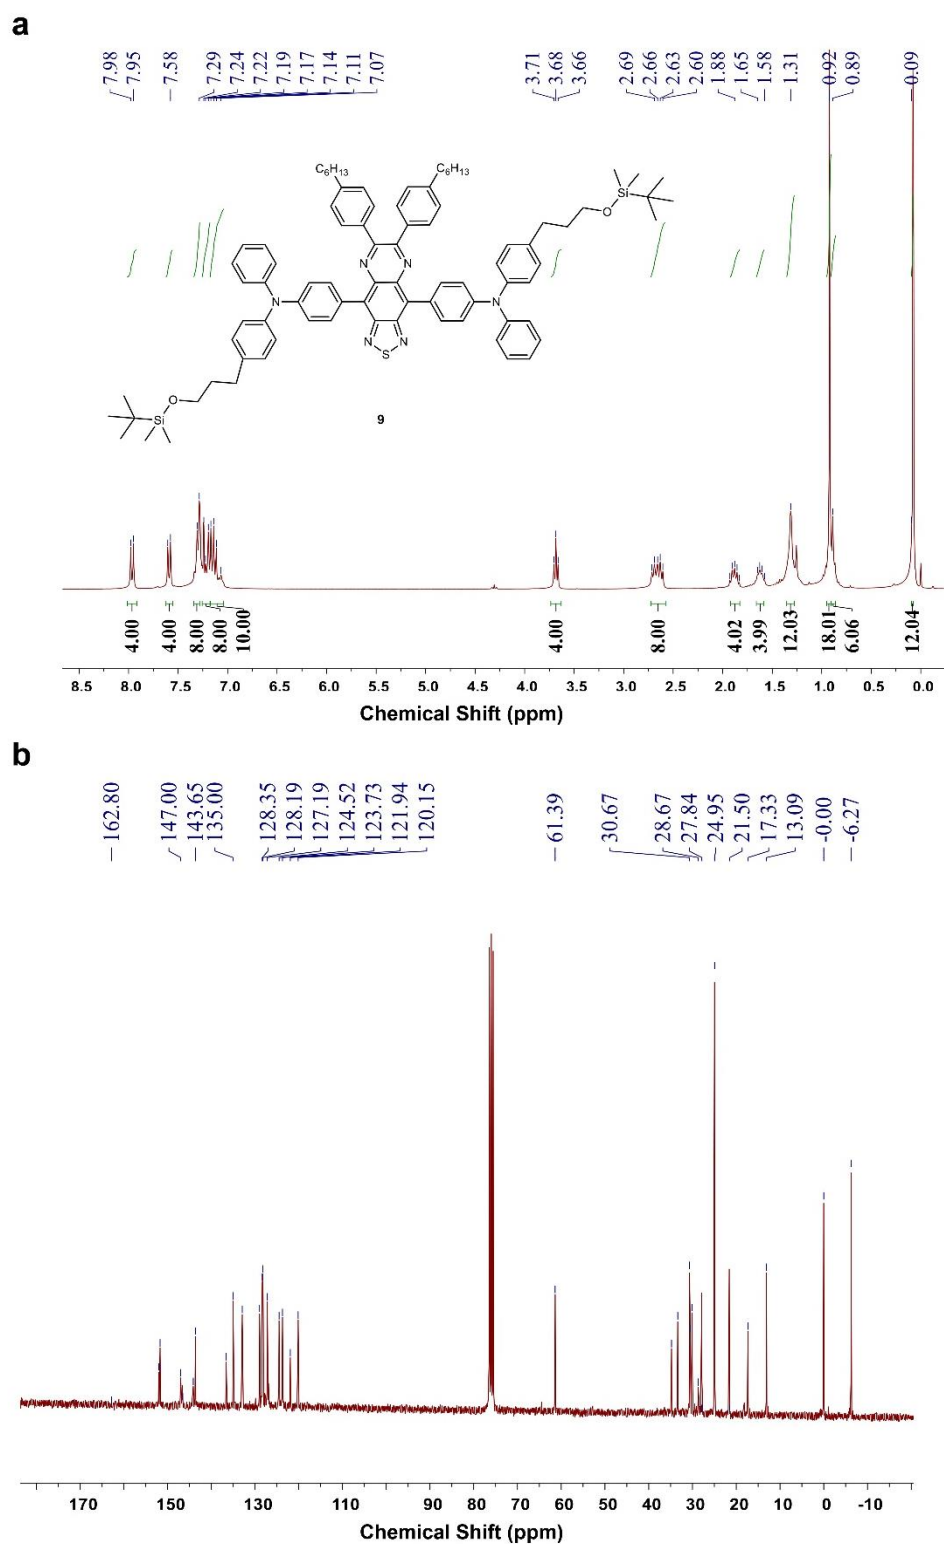

**Supplementary Figure 9.** Characterization of 4,4'-(6,7-bis(4-hexylphenyl)-[1,2,5]thiadiazolo[3,4-g]quinoxaline-4,9-diyl)bis(*N*-(4-(3-((tert-butyl)dimethylsilyl)oxy)propyl)phenyl)-*N*-phenylaniline) **9** by NMR in CDCl<sub>3</sub>. (a) <sup>1</sup>H-NMR and (b) <sup>13</sup>C-NMR of compound **9**.

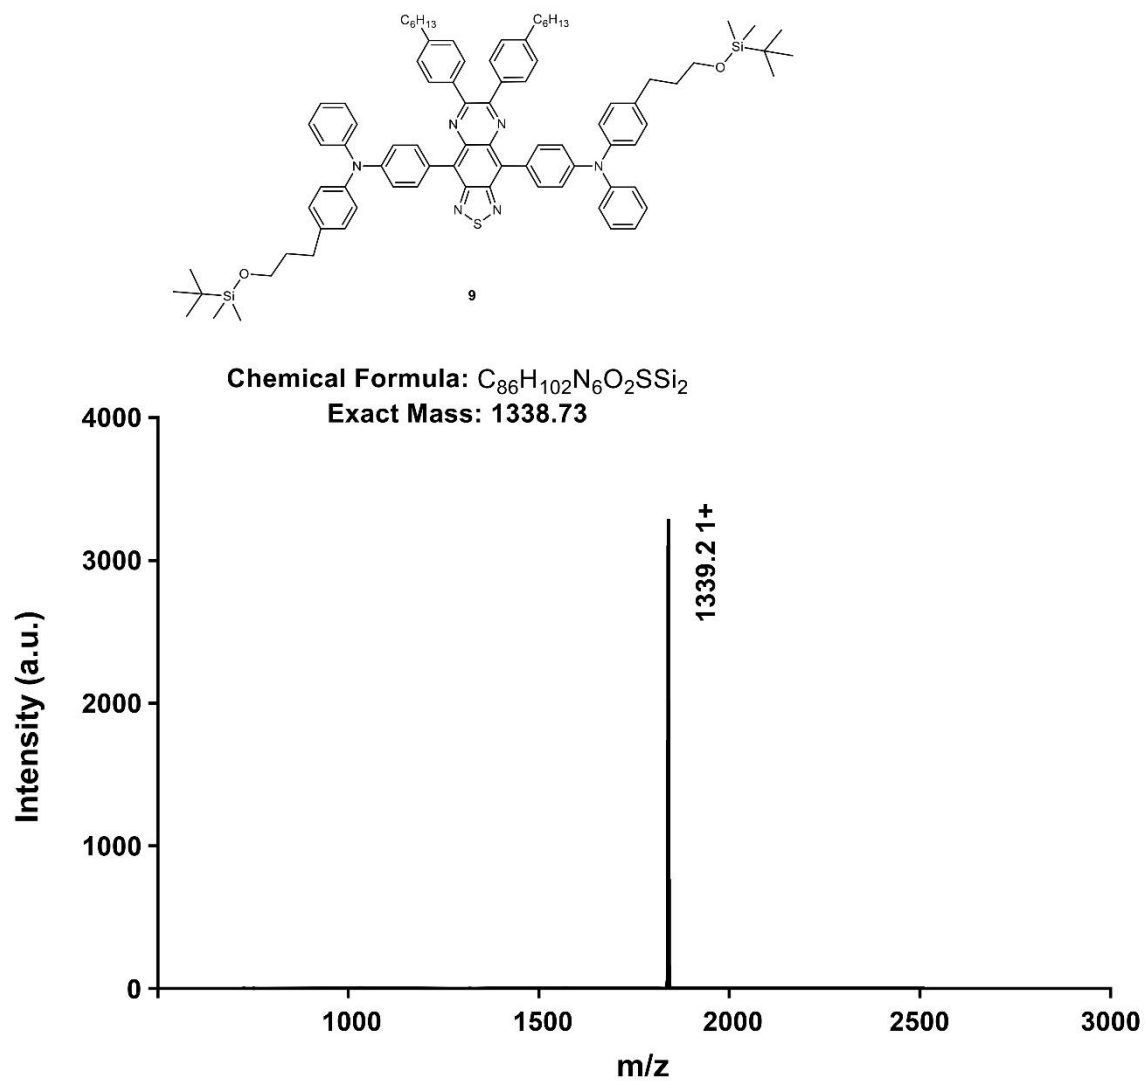

**Supplementary Figure 10.** MALDI-TOF spectra of 9. Matrix: alpha-cyanocinnamic acid.

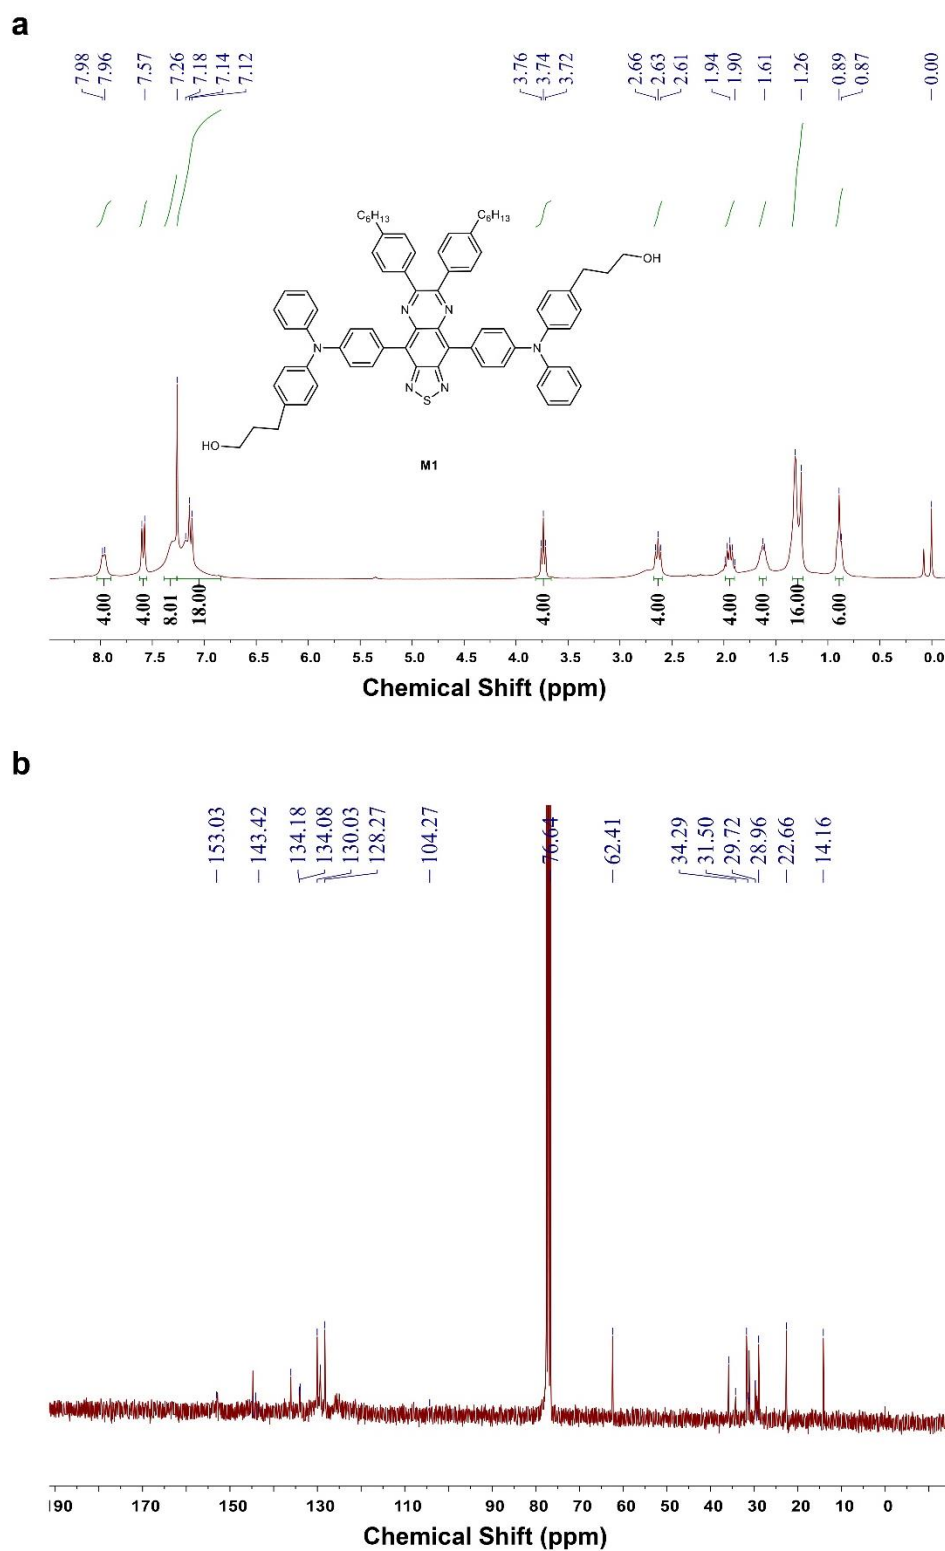

**Supplementary Figure 11.** Characterization of 3,3'-((((6,7-bis(4-hexylphenyl)-[1,2,5]thiadiazolo[3,4-g]quinoxaline-4,9-diyl)bis(4,1-phenylene))bis(phenylazanediyl))bis(4,1-phenylene))bis(propan-1-ol) M1 by NMR in CDCl<sub>3</sub>. (a) <sup>1</sup>H-NMR and (b) <sup>13</sup>C-NMR of M1.

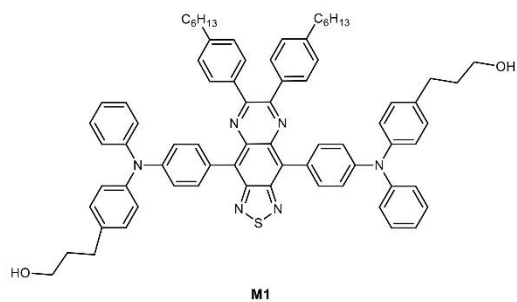

**Chemical Formula:**  $C_{74}H_{74}N_6O_2S$

**Exact Mass:** 1110.56

**Molecular Weight:** 1111.51

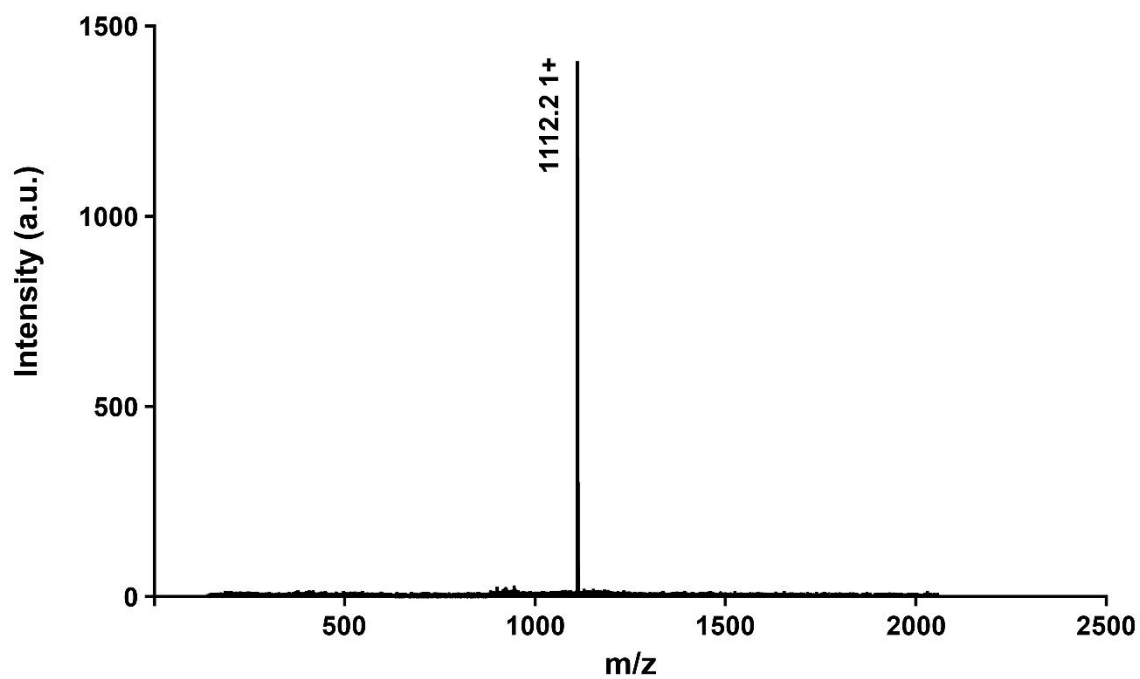

**Supplementary Figure 12.** MALDI-TOF spectra of M1. Matrix: alpha-cyanocinnamic acid.



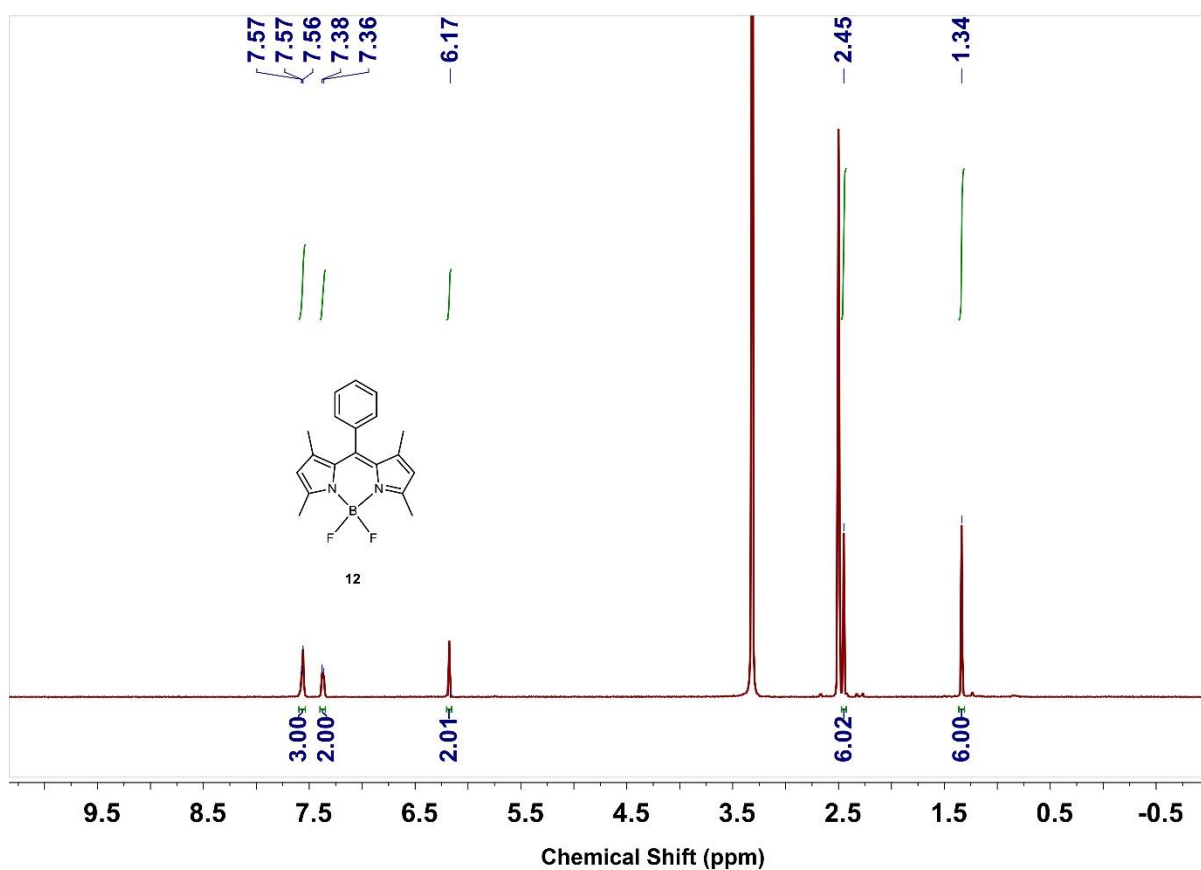

**Supplementary Figure 13.**  $^1\text{H}$ -NMR spectra of 5,5-difluoro-1,3,7,9-tetramethyl-10-phenyl-5H--4 $\lambda^4$ ,5 $\lambda^4$ -dipyrrolo[1,2-c:2',1'-f][1,3,2]diazaborinine 12 in  $\text{DMSO}-d_6$ .

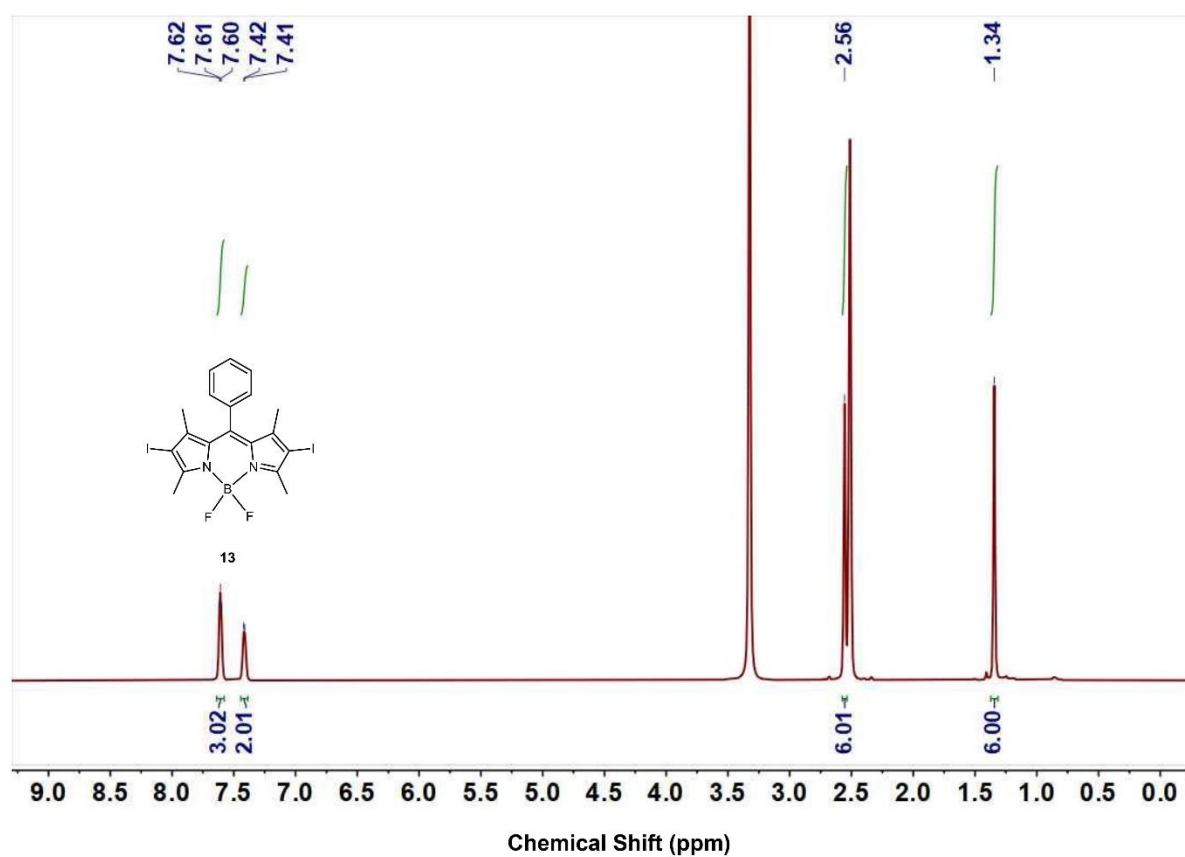

**Supplementary Figure 14.** <sup>1</sup>H-NMR spectra of 5,5-difluoro-2,8-diiodo-1,3,7,9-tetramethyl-10-phenyl-5H-4λ<sup>4</sup>,5λ<sup>4</sup>-dipyrrolo[1,2-c:2',1'-f][1,3,2]diazaborinine 13 in DMSO-*d*<sub>6</sub>.

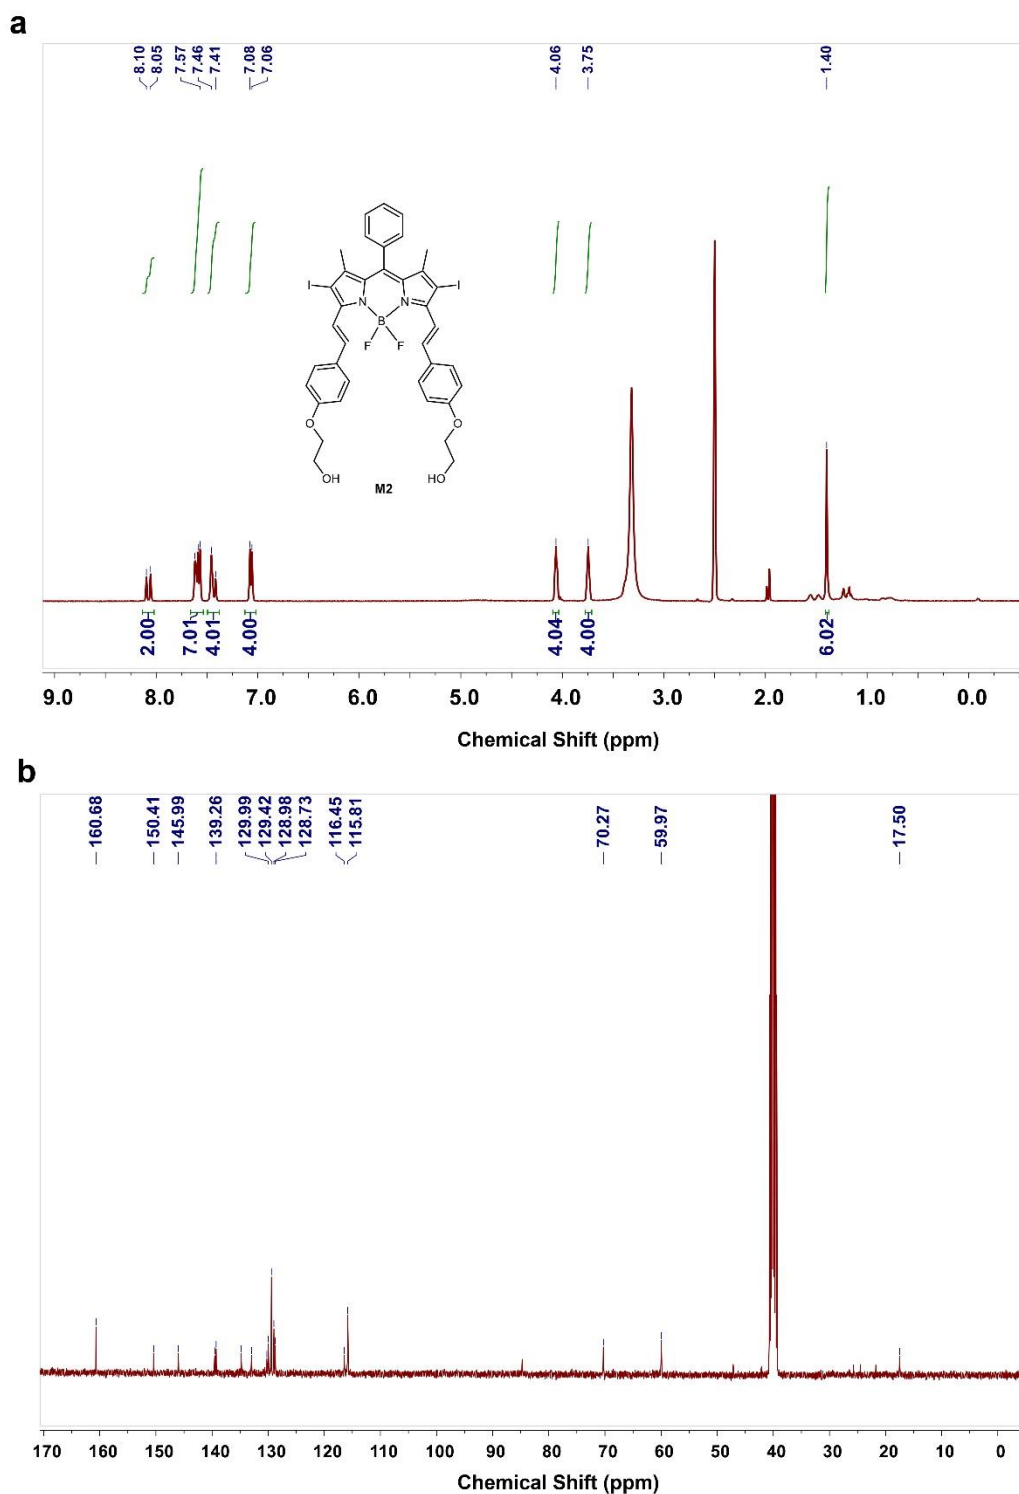

**Supplementary Figure 15.** Characterization of 2,2'-((((1*E*,1'*E*)-(5,5-difluoro-2,8-diiodo-1,9-dimethyl-10-phenyl-5*H*-4 $\lambda^4$ ,5 $\lambda^4$ -dipyrrolo[1,2-*c*:2',1'-*f*][1,3,2]diazaborinine-3,7-diyl)bis(ethene-2,1-diyl))bis(4,1-phenylene))bis(oxy))bis(ethan-1-ol) M2 by NMR in DMSO-*d*<sub>6</sub>. (a) <sup>1</sup>H-NMR and (b) <sup>13</sup>C-NMR of M2.



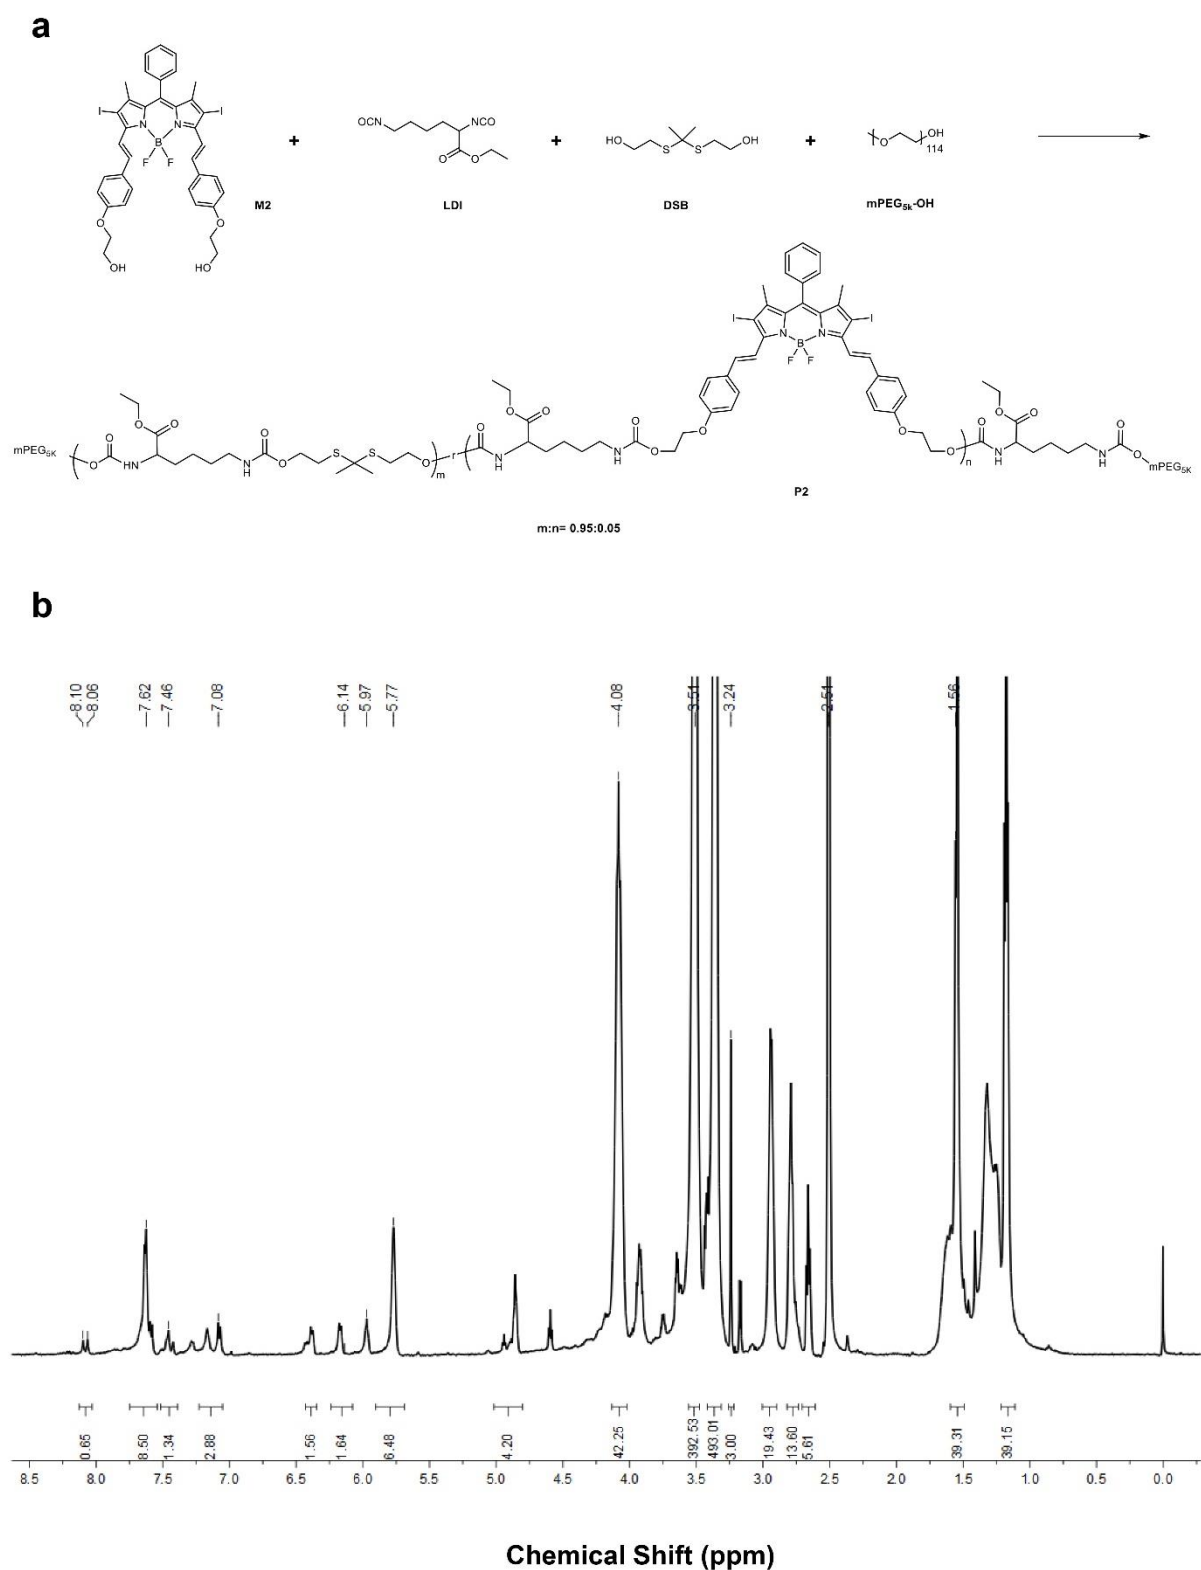

**Supplementary Figure 17.** Synthesis and characterization of P2. (a) Synthetic scheme for P2. (b)  $^1\text{H}$ -NMR of P2 in  $\text{DMSO}-d_6$ .

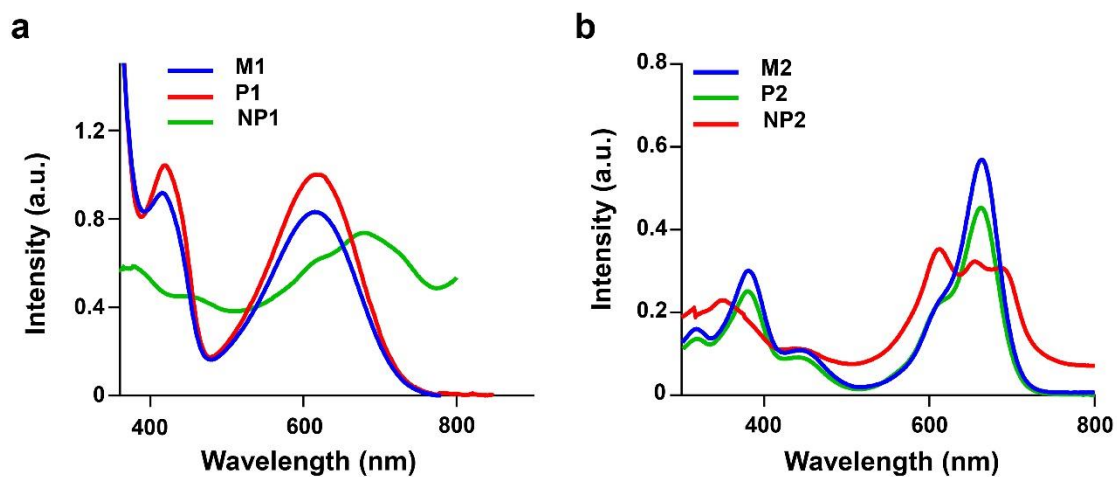

**Supplementary Figure 18.** UV-vis absorption spectra of monomers, polymers and nanoparticles. (a) UV-vis absorption spectra of M1 in DCM (370  $\mu\text{g/mL}$ ), P1 in DCM (4  $\text{mg/mL}$ ), and NP1 in water. (b) UV-vis absorption spectra of M2 in DCM (15  $\mu\text{g/mL}$ ), P2 in DCM (75  $\mu\text{g/mL}$ ), and NP2 in water.

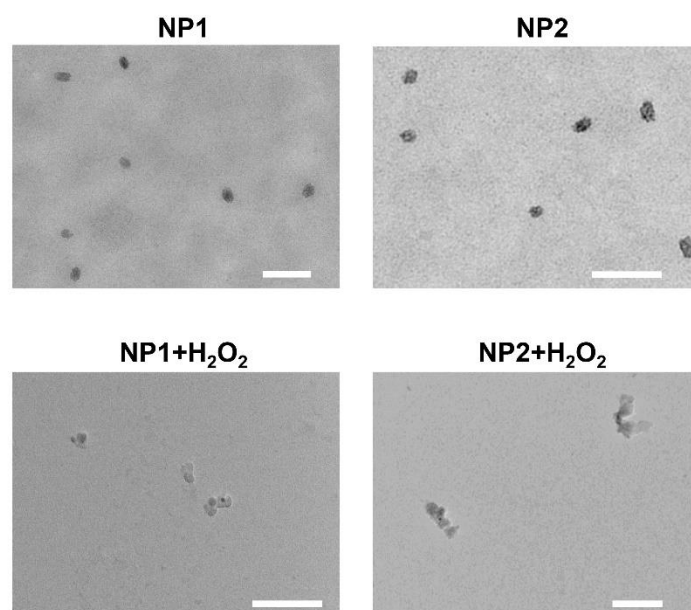

**Supplementary Figure 19.** Representative transmission electron microscope images of NP1 (P1: 0.5 mg/mL) and NP2 (P2: 0.5 mg/mL) upon addition of H<sub>2</sub>O<sub>2</sub> (10 mM). The experiment was repeated independently 3 times with similar results. Scale bar = 200 nm.

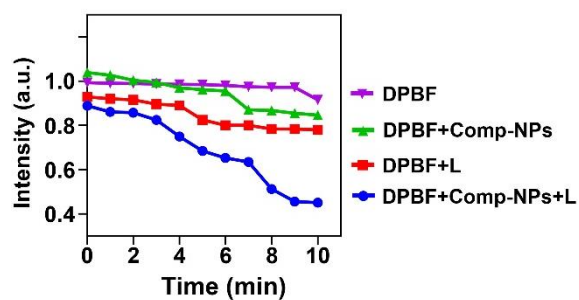

**Supplementary Figure 20.** Change in absorption at 410 nm corresponding to the ROS specific probe 1,3-diphenylisobenzofuran (DPBF) upon incubation of Comp-NPs and irradiation (L, 650 nm,  $0.1 \text{ W cm}^{-2}$ ,  $60 \text{ J cm}^{-2}$ , 10 min). ( $n = 3$  independent samples)



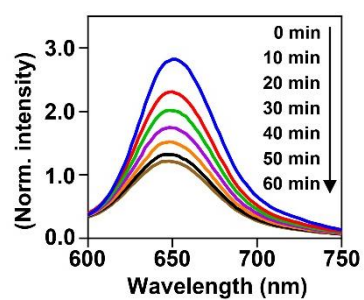

**Supplementary Figure 21.** Phosphorescence spectra of Comp-NPs encapsulated with the dye Nile Red ( $\lambda_{ex} = 550$  nm) upon irradiation (650 nm,  $0.1 \text{ W cm}^{-2}$ ). ( $n = 3$  independent samples)

**Supplementary Table 1.** Determination of the average size and polydispersity of NP1, NP2, and Comp-NPs in water.

| Samples  | Z-Average size (nm) | Polydispersity |
|----------|---------------------|----------------|
| NP1      | 94.3                | 0.218          |
| NP2      | 91.8                | 0.251          |
| Comp-NPs | 102.9               | 0.212          |

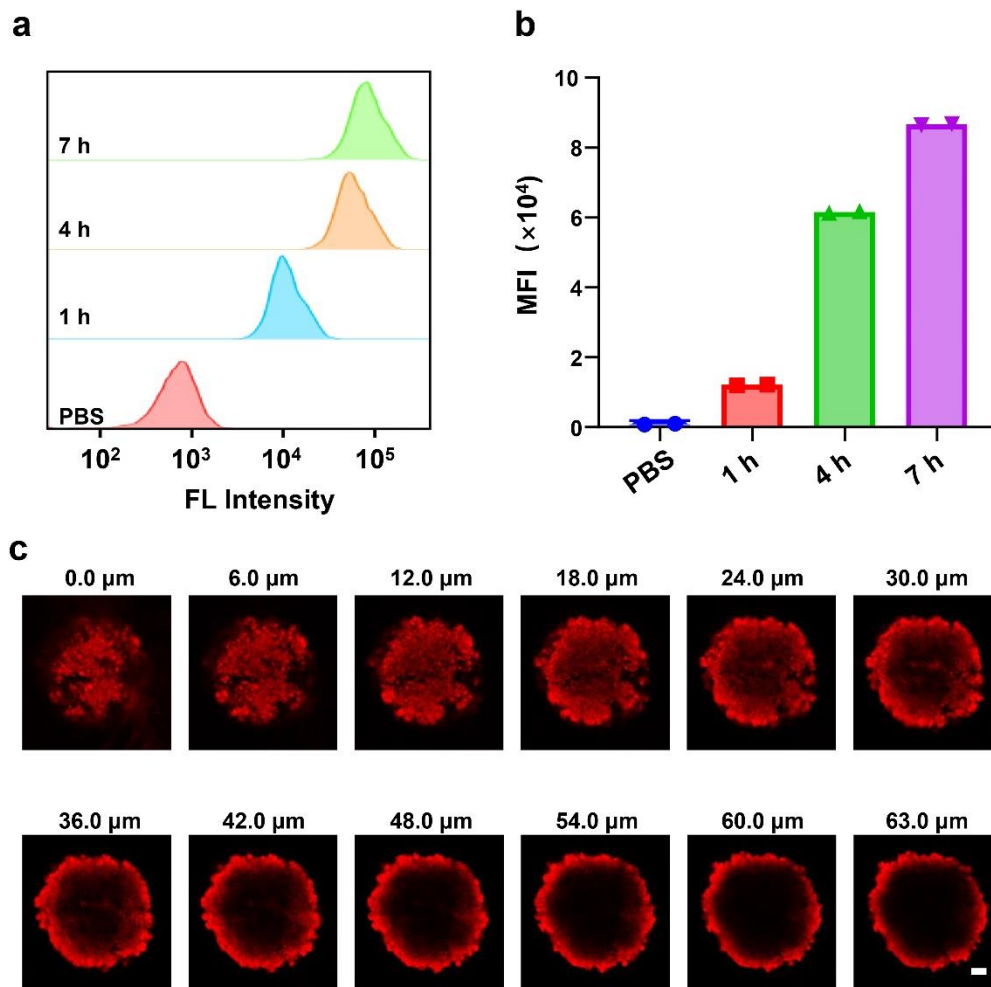

**Supplementary Figure 22.** The cellular uptake of Comp-NPs by 4T1 cells and 4T1 multicellular tumor spheroids. (a) The cellular uptake of Comp-NPs (1  $\mu\text{g/mL}$  BODIPY) in 4T1 cells after various incubation times by flow cytometry. (b) Quantification of the cellular uptake from (a) ( $n = 2$  biologically independent samples). (c) Z-stack CLSM images of Comp-NPs (1  $\mu\text{g/mL}$  BODIPY) in 4T1 multicellular tumor spheroids after 7 h. The experiment was repeated independently 3 times with similar results. Comp-NPs:  $\lambda_{ex} = 650 \text{ nm}$ ,  $\lambda_{em} = 745 \text{ nm}$ . Scale bar = 100  $\mu\text{m}$ .

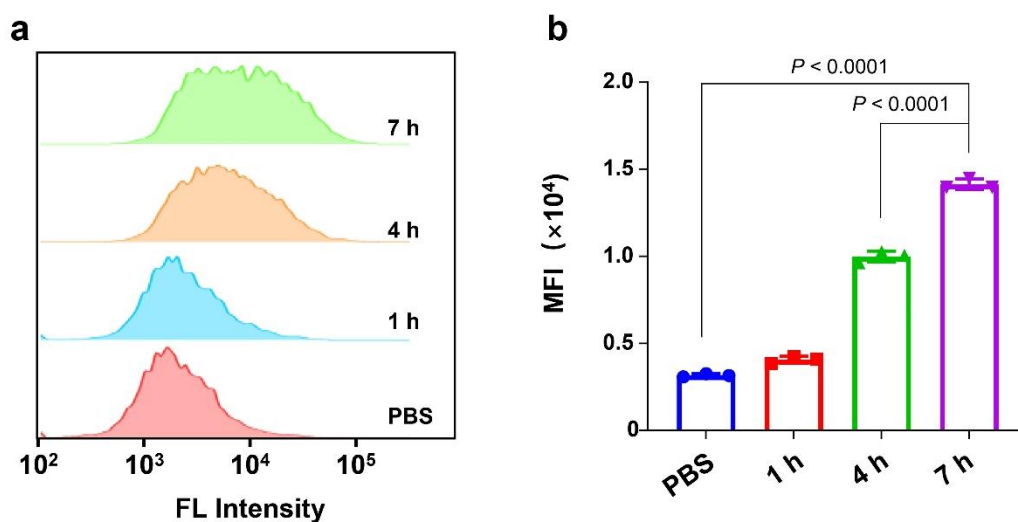

**Supplementary Figure 23.** ROS generation of Comp-NPs (0.5  $\mu\text{g/mL}$  BODIPY) in 4T1 cells after various incubation times by flow cytometry. (a) Histogram of ROS generation of Comp-NPs by flow cytometry. (b) Semi-quantification of ROS generation of Comp-NPs by flow cytometry ( $n = 3$  biologically independent samples). Error bars represent mean  $\pm$  SD. Statistical analysis was performed by two-tailed unpaired  $t$ -test.

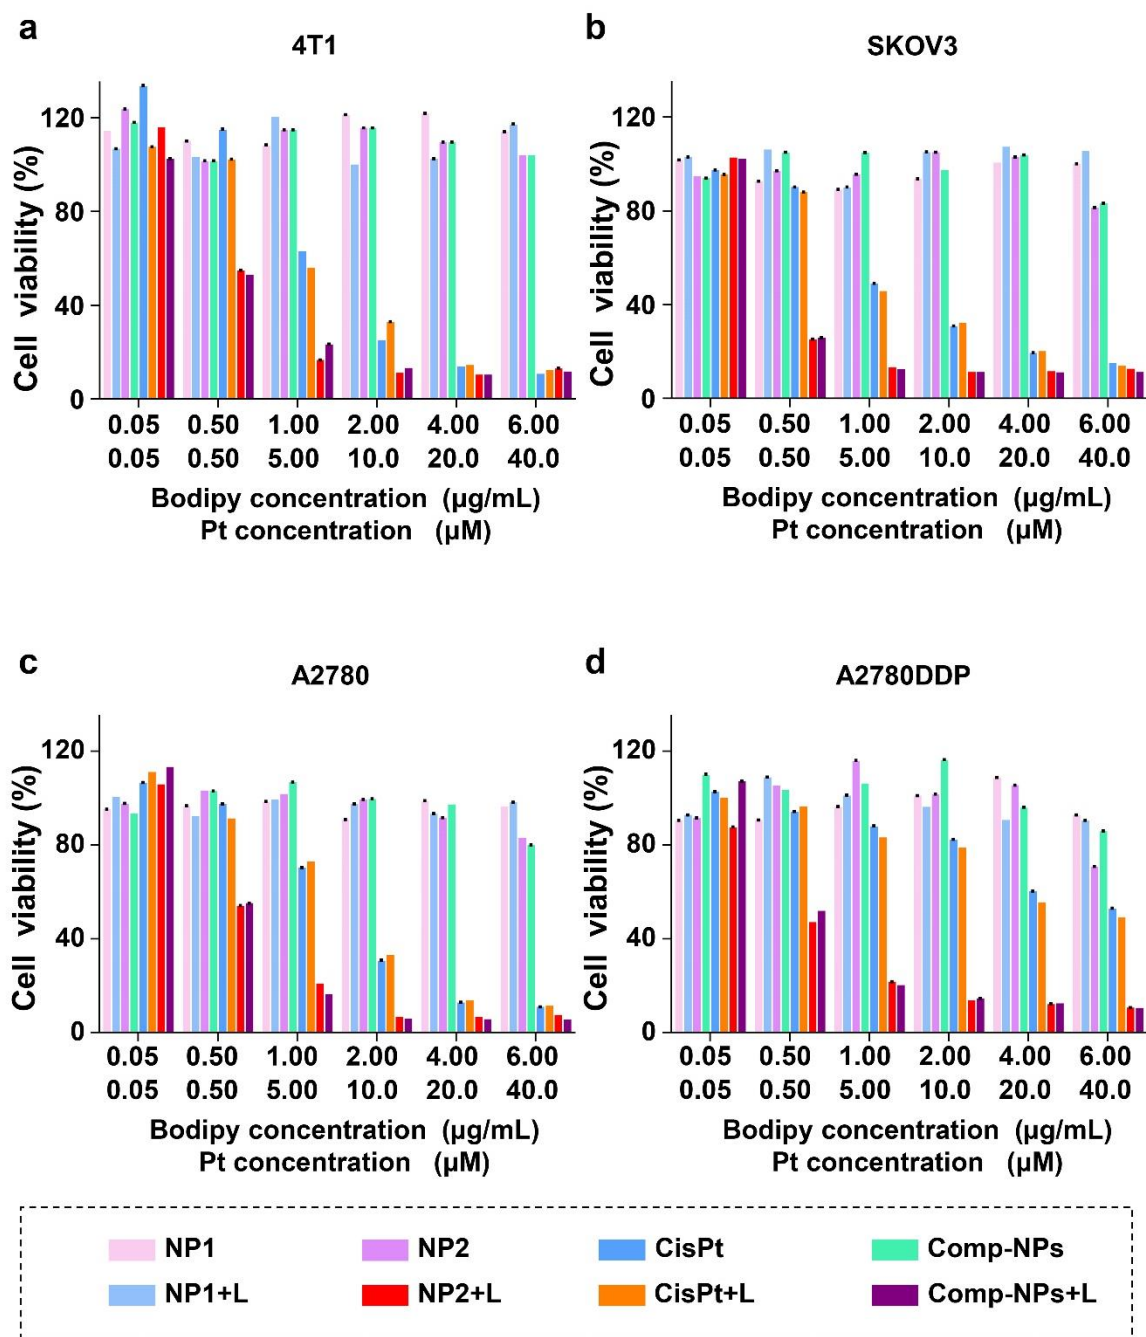

**Supplementary Figure 24.** *In vitro* anticancer activity test of the nanoparticles and cisplatin. Relative cell viability of (a) 4T1, (b) SKOV3, (c) A2780 and (d) A2780DDP cells upon treatment with NP1, NP2, Comp-NPs, and cisplatin (CisPt) in the dark or upon irradiation (L, 650 nm,  $0.1 \text{ W cm}^{-2}$ ,  $60 \text{ J cm}^{-2}$ , 10 min). ( $n = 3$  biologically independent samples)

**Supplementary Table 2.** IC<sub>50</sub> values of BODIPY of NP1, NP2, Comp-NPs in  $\mu\text{g/mL}$ , and cisplatin (CisPt)  $\mu\text{M}$  in the dark or upon irradiation ( $650\text{ nm}$ ,  $0.1\text{ W cm}^{-2}$ ,  $60\text{ J cm}^{-2}$ ,  $10\text{ min}$ ) in 4T1, SKOV3, A2780 and A2780DDP cells.

| Cell line | 4T1             |                 | SKOV3           |                 | A2780           |                 | A2780DDP         |                 |
|-----------|-----------------|-----------------|-----------------|-----------------|-----------------|-----------------|------------------|-----------------|
| Sample    | Dark            | Light           | Dark            | Light           | Dark            | Light           | Dark             | Light           |
| NP1       | > 6             | > 6             | > 6             | > 6             | > 6             | > 6             | > 6              | > 6             |
| NP2       | > 6             | $0.46 \pm 0.13$ | > 6             | $0.30 \pm 0.01$ | > 6             | $0.49 \pm 0.04$ | > 6              | $0.47 \pm 0.01$ |
| Comp-NPs  | > 6             | $0.47 \pm 0.03$ | > 6             | $0.32 \pm 0.12$ | > 6             | $0.47 \pm 0.04$ | > 6              | $0.45 \pm 0.12$ |
| CisPt     | $4.01 \pm 0.01$ | $4.91 \pm 0.02$ | $4.13 \pm 0.14$ | $4.01 \pm 0.02$ | $6.34 \pm 0.13$ | $6.68 \pm 0.03$ | $13.56 \pm 0.10$ | $13.8 \pm 0.01$ |

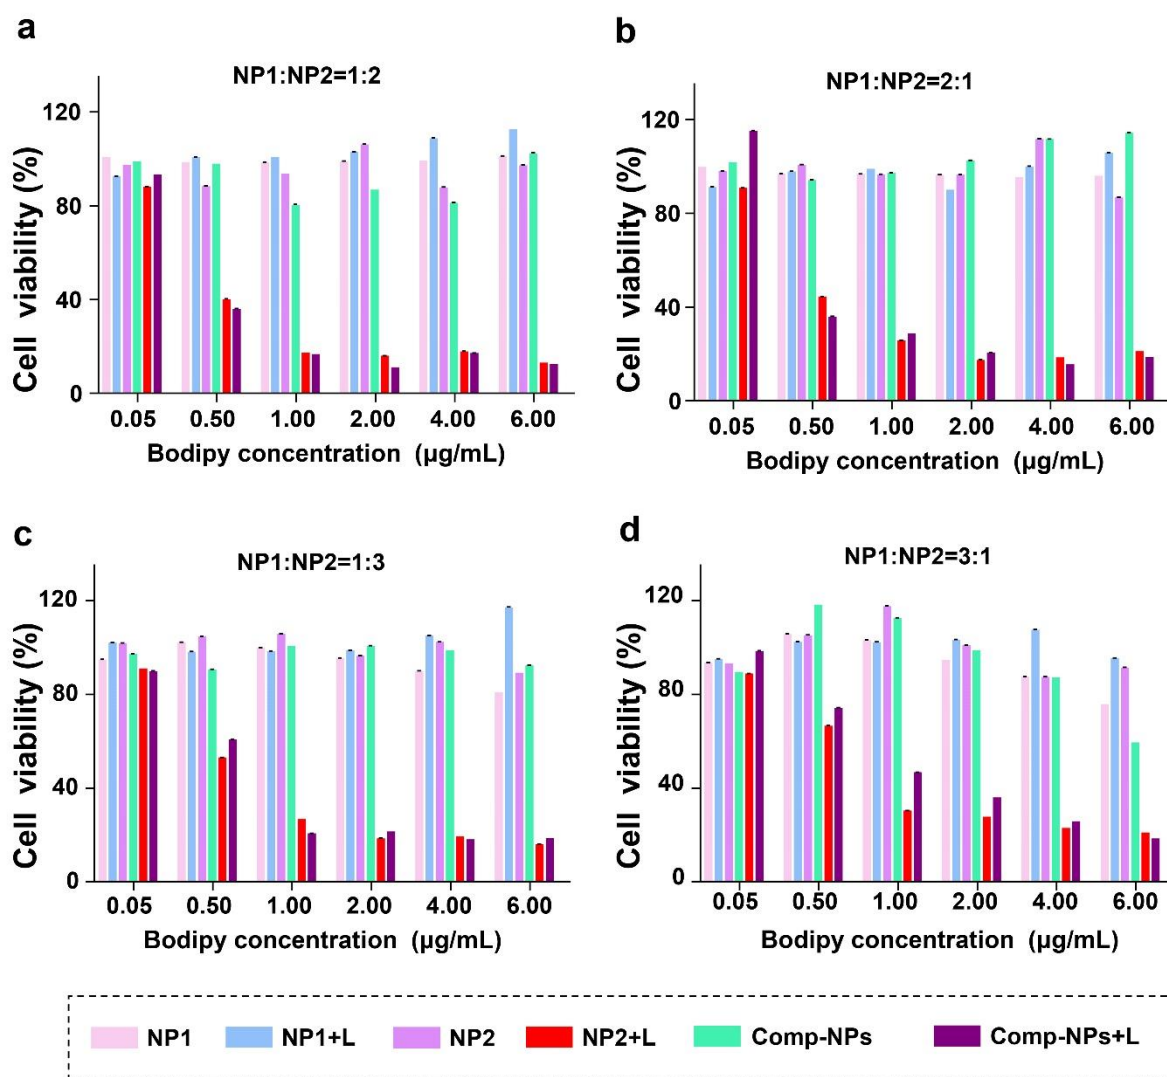

**Supplementary Figure 25.** In vitro anticancer activity test of Comp-NPs that have been produced with various ratios of NP1 to NP2 (a) 1:2, (b) 2:1, (c) 1:3, (d) 3:1 against 4T1 cells in the dark or upon irradiation (L, 650 nm, 0.1 W cm<sup>-2</sup>, 60 J cm<sup>-2</sup>, 10 min). (*n* = 3 biologically independent samples)

**Supplementary Table 3.** IC<sub>50</sub> values of Comp-NPs that have been produced with various ratios of NP1 to NP2 (a) 1:2, (b) 2:1, (c) 1:3, (d) 3:1 against 4T1 cells in the dark or upon irradiation (L, 650 nm, 0.1 W cm<sup>-2</sup>, 60 J cm<sup>-2</sup>, 10 min). (*n* = 3)

| Ratio of NP1:NP2 | Dark | Light       |
|------------------|------|-------------|
| 1:2              | >6   | 0.38 ± 0.05 |
| 2:1              | >6   | 0.40 ± 0.02 |
| 1:3              | >6   | 0.53 ± 0.02 |
| 3:1              | >6   | 0.76 ± 0.10 |



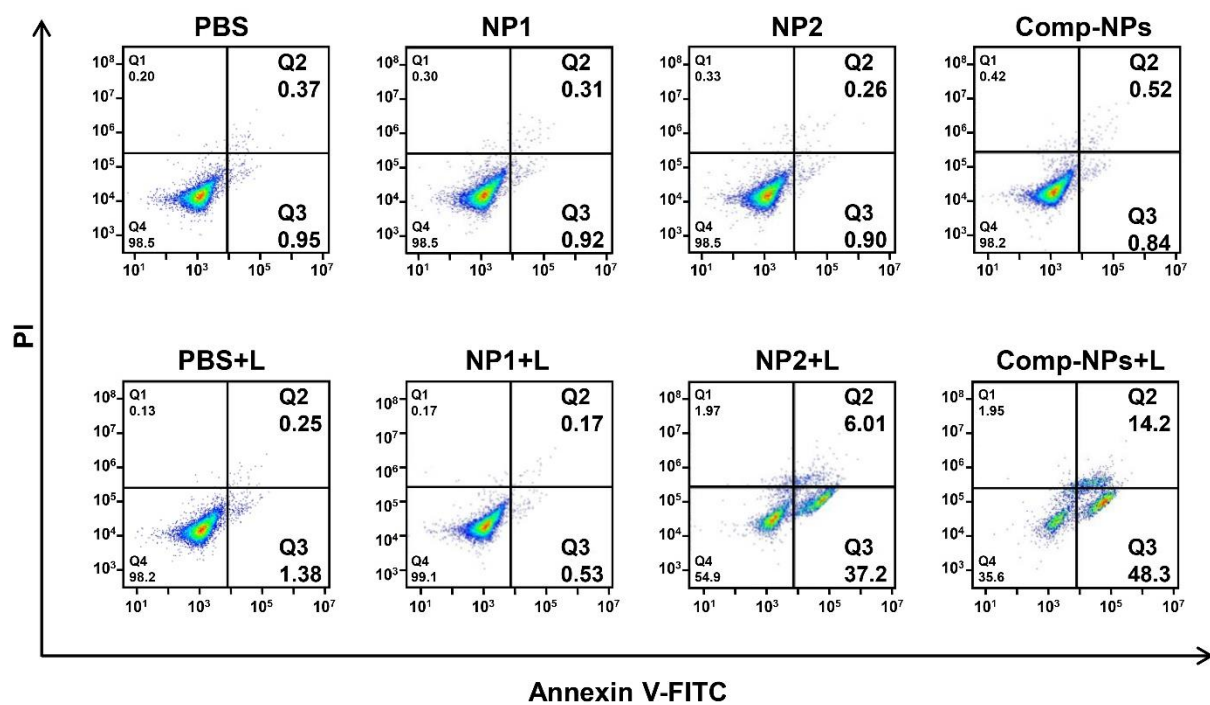

**Supplementary Figure 26.** Analysis of the cell death of 4T1 cells upon treatment with NP1, NP2, and Comp-NPs, in the dark or upon irradiation (L, 650 nm,  $0.1 \text{ W cm}^{-2}$ ,  $30 \text{ J cm}^{-2}$ , 5 min). ( $n = 3$  biologically independent samples)

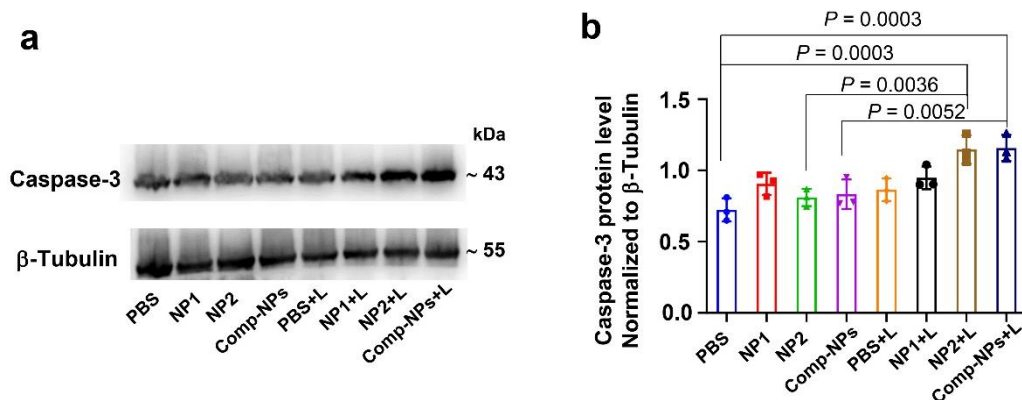

**Supplementary Figure 27.** (a) Western Blot of the caspase-3 protein expression levels in 4T1 cells after treatment with NP1, NP2, and Comp-NPs, in the dark or upon irradiation (L, 650 nm,  $0.1 \text{ W cm}^{-2}$ ,  $30 \text{ J cm}^{-2}$ , 5 min). (b) Caspase protein expression levels through semiquantitative analysis from the Western Blot in (a) ( $n = 3$  biologically independent cells). β-Tubulin was used as a reference. Error bars represent mean  $\pm$  SD. Statistical analysis was performed by one-way ANOVA with a Tukey's multiple comparisons test.

Full-scale pictures:

Caspase-3 (left, anti-caspase-3 antibody, ab184787, 1:1000; Peroxidase-Conjugated Goat Anti-Rabbit IgG (H + L), CAT:33101ES60, 1:5000). β-Tubulin (right, anti-β-tubulin antibody, ab78078, 1:1000; Peroxidase-Conjugated Goat Anti-Mouse IgG (H + L), CAT:33201ES60, 1:5000)

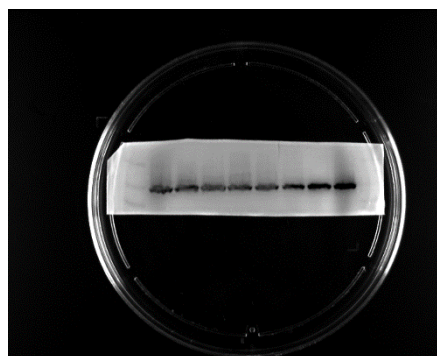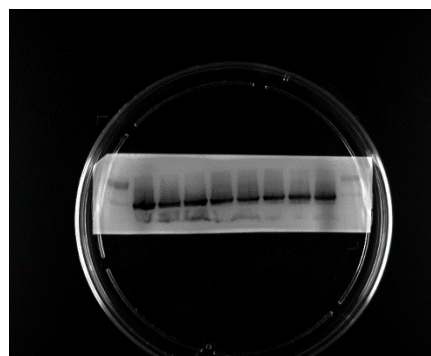

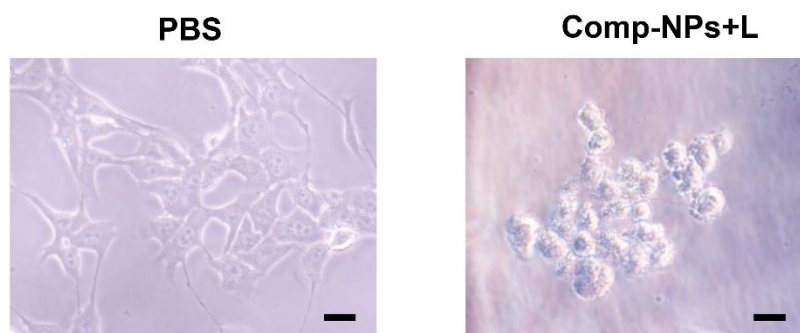

**Supplementary Figure 28.** Light microscopy images of 4T1 cancer cells upon incubation with phosphate-buffered saline (left) or Comp-NPs upon irradiation (L, 650 nm,  $0.1 \text{ W cm}^{-2}$ ,  $30 \text{ J cm}^{-2}$ , 5 min). The experiment was repeated independently 3 times with similar results. scale bar =  $20 \mu\text{m}$ .

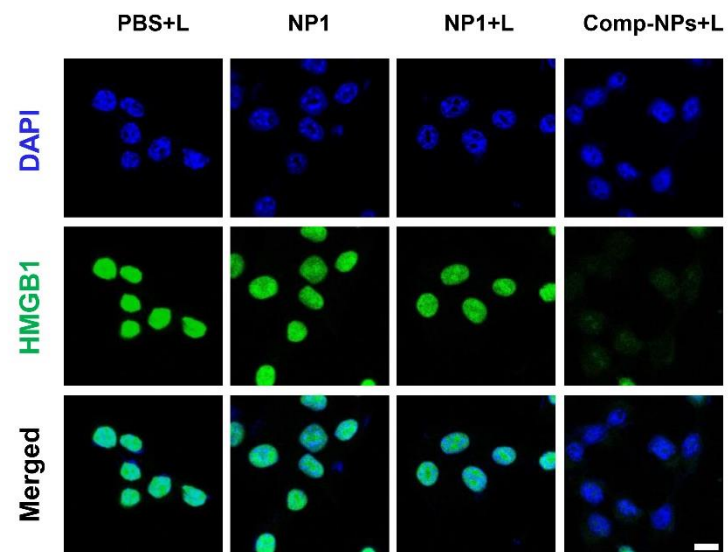

**Supplementary Figure 29.** CLSM images of 4T1 incubated with HMGB1 protein fluorescent probe (green) and DAPI (blue) upon various treatments. The experiment was repeated independently 3 times with similar results. scale bar = 10  $\mu$ m.

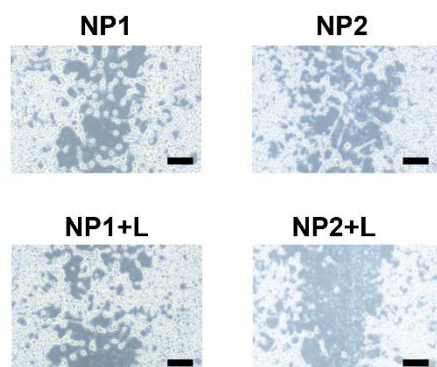

**Supplementary Figure 30.** Cell migration wound healing assay of 4T1 cells upon various treatments in the light (650 nm,  $0.1 \text{ W cm}^{-2}$ ,  $30 \text{ J cm}^{-2}$ , 5 min). The experiment was repeated independently 3 times with similar results. scale bar =  $50 \mu\text{m}$ .

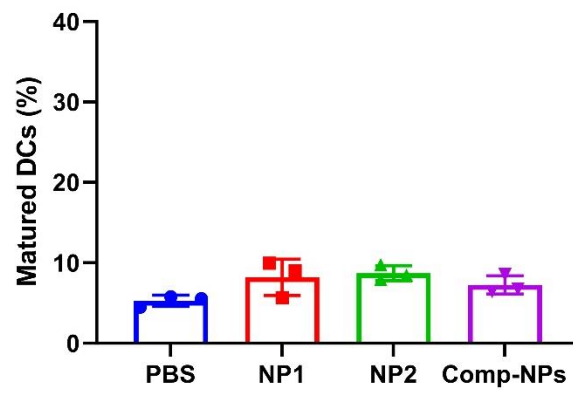

**Supplementary Figure 31.** Flow cytometry examination of DCs maturation upon various treatments in the dark ( $n = 3$  biologically independent samples). Error bars represent mean  $\pm$  SD.

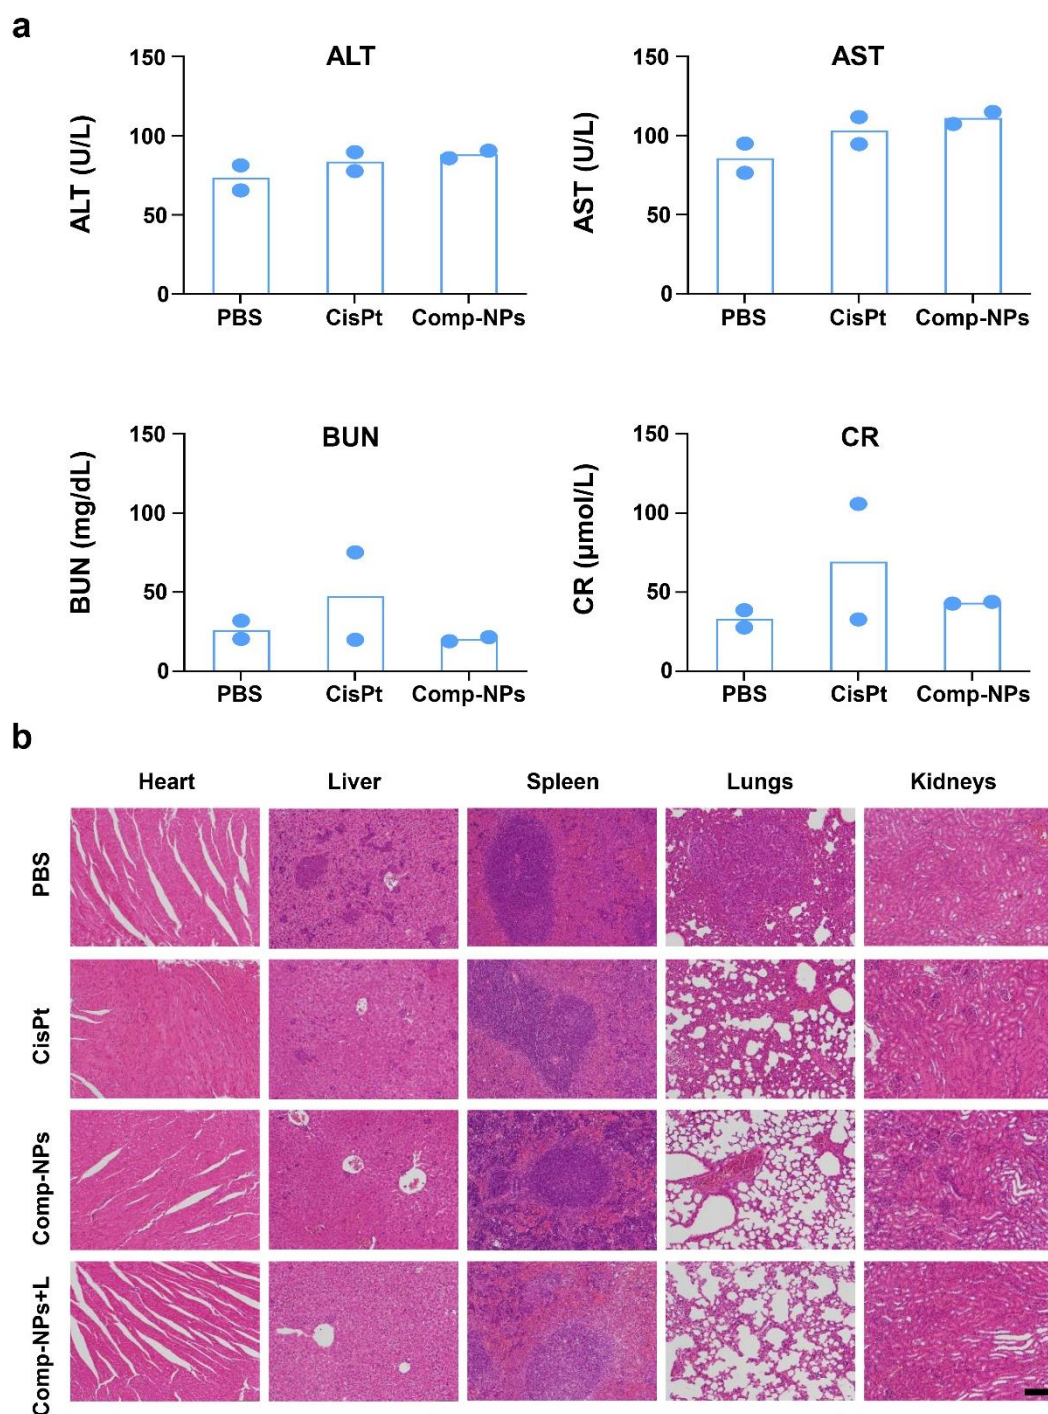

**Supplementary Figure 32.** *In vivo* systemic toxicities study. (a) Quantification of the levels of various serum indicators upon various treatments of 4T1 tumor bearing mice ( $n = 2$  mice). (b) H&E stain of organs upon various treatments of 4T1 tumor bearing mice. The experiment was repeated independently 3 times with similar results. scale bar = 100  $\mu\text{m}$ . (The images are representative of 5 mice per group).

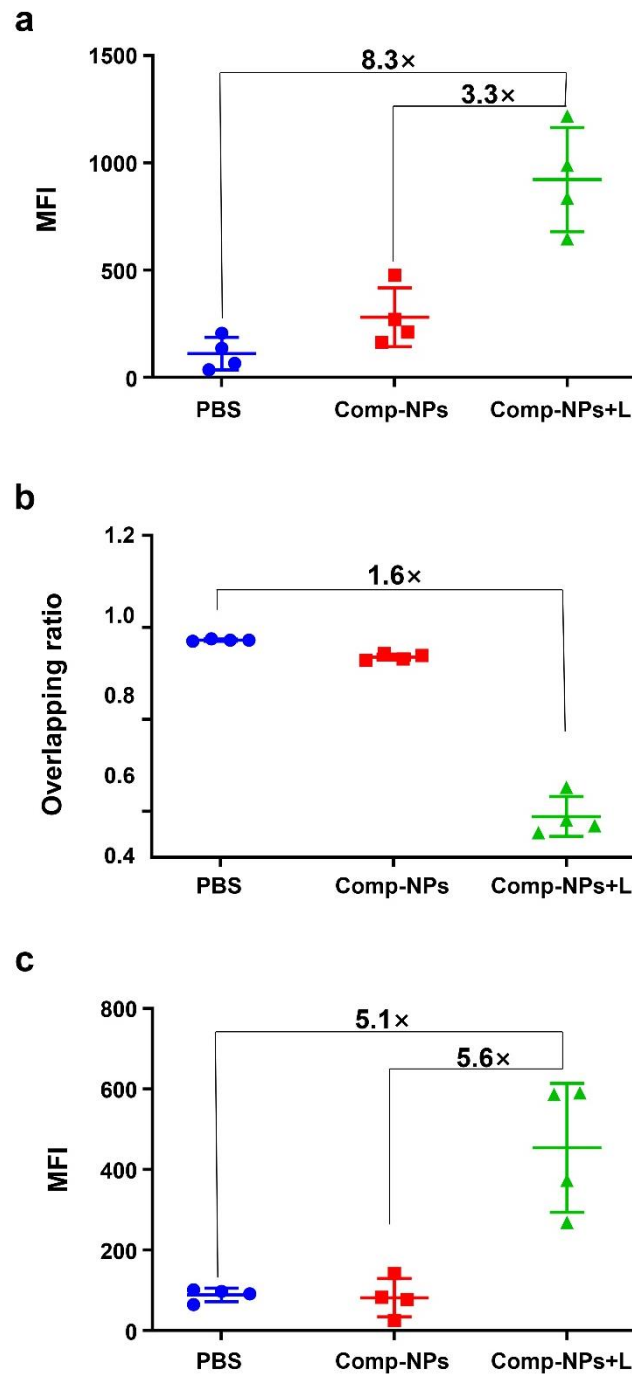

**Supplementary Figure 33.** Semi-quantifications of mean fluorescence intensity of Figure 4B. (a) Quantifications of mean fluorescence intensity of the CRT specific probe from Figure 4B top panel ( $n = 4$  biologically independent samples). Error bars represent mean  $\pm$  SD. (b) Quantifications of the ratio of the HMGB1 protein specific probe and the nucleus stain DAPI from Figure 4B middle panel ( $n = 4$  biologically independent samples). Error bars represent mean  $\pm$  SD. (c) Quantifications of mean fluorescence intensity of the CD8<sup>+</sup> T cells specific probe from Figure 4B bottom panel ( $n = 4$  biologically independent samples). Error bars represent mean  $\pm$  SD.



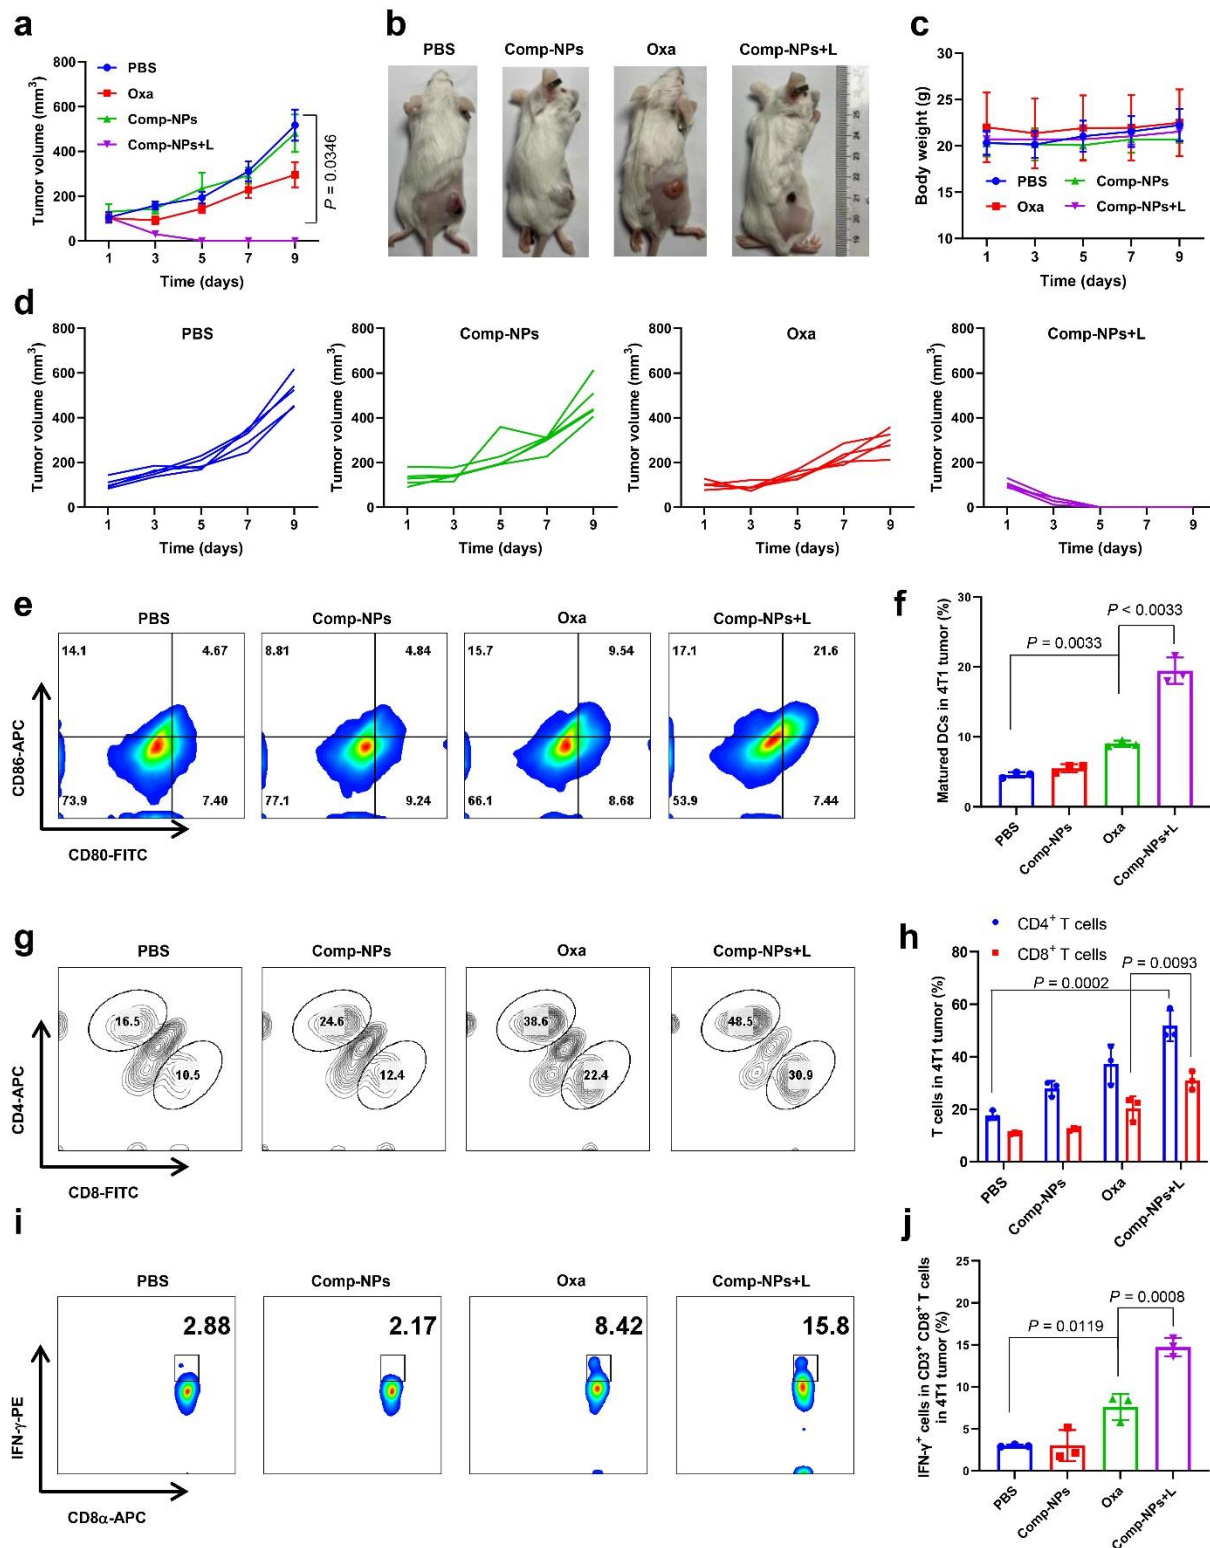

**Supplementary Figure 34.** In vivo anticancer efficacy on 4T1 tumor-bearing mice. (a) Tumor growth curves of 4T1 tumor-bearing mice upon different treatments with Comp-NPs (6 mg BODIPY kg<sup>-1</sup>) or Oxa (0.5 mg Pt kg<sup>-1</sup>) in the dark or upon irradiation (650 nm, 0.1 W cm<sup>-2</sup>, 60 J cm<sup>-2</sup>, 10 min) ( $n = 5$  mice). Error bars represent mean  $\pm$  SD. Statistical analysis was performed by one-way ANOVA with a Tukey's multiple comparisons test. (b) Photographs of the tumor

after the treatment. (c) Monitoring of the weight of the animal model. (d) Individual tumor growth inhibition curves. ( $n = 5$  mice) Error bars represent mean  $\pm$  SD. (e, f) Flow cytometry plot and quantification of CD80<sup>+</sup>CD86<sup>+</sup> dendritic cells gated on CD11c<sup>+</sup> cells in the tumorous tissue. ( $n = 3$  mice). Error bars represent mean  $\pm$  SD. Statistical analysis was performed by one-way ANOVA with a Tukey's multiple comparisons test. (g, h) Flow cytometry plot and quantification of CD8<sup>+</sup> T cells and CD4<sup>+</sup> T cells gated on CD3<sup>+</sup> cells in the tumorous tissue. ( $n = 3$  mice) Error bars represent mean  $\pm$  SD. Statistical analysis was performed by one-way ANOVA with a Tukey's multiple comparisons test. (i, j) Flow cytometry plot and quantification of IFN- $\gamma$ <sup>+</sup>CD8<sup>+</sup> T cells gated on CD3<sup>+</sup> CD8<sup>+</sup> T cells in the tumorous tissue. ( $n = 3$  mice). Error bars represent mean  $\pm$  SD. Statistical analysis was performed by one-way ANOVA with a Tukey's multiple comparisons test.

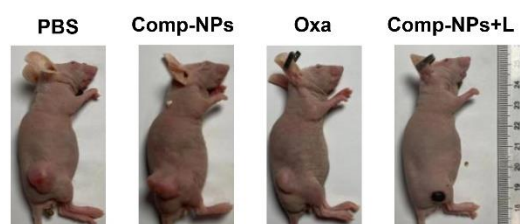

**Supplementary Figure 35.** Photographs of the animals after various treatments.

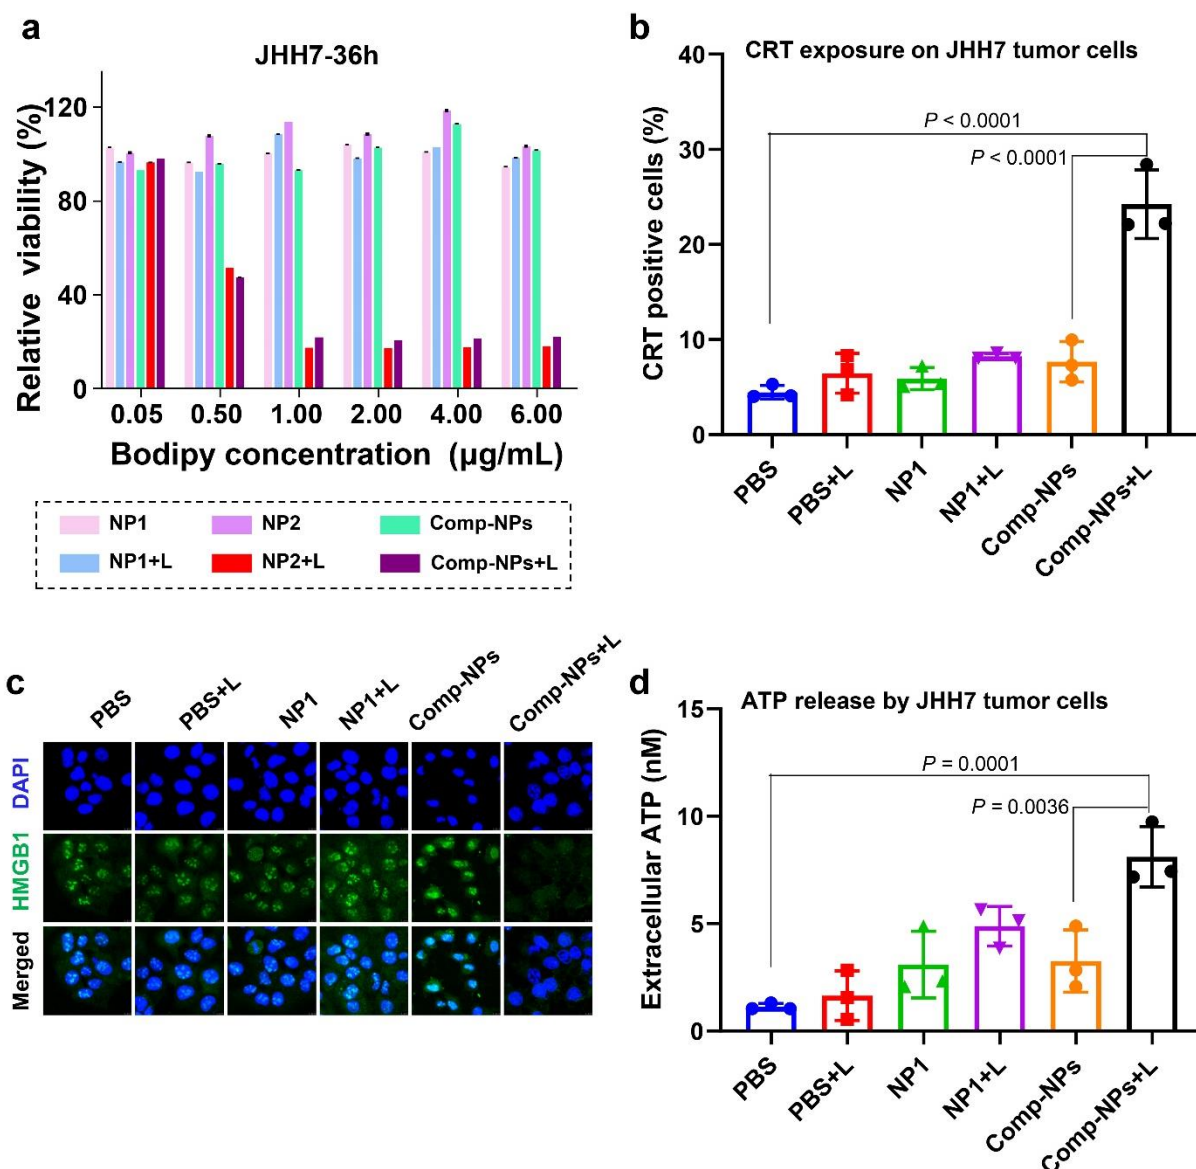

**Supplementary Figure 36.** *In vitro* anticancer activity test and ICD effect of Comp-NPs on JHH7 cells. (a) Relative cell viability of JHH7 cells. (b) Quantification of the translocation of CRT to the cell surface of JHH7 cells upon various treatments in the light ( $650\text{ nm}$ ,  $0.1\text{ W cm}^{-2}$ ,  $2\text{ min}$ ) by flow cytometry ( $n = 3$  biologically independent samples). Error bars represent mean  $\pm$  SD. Statistical analysis was performed by one-way ANOVA with a Tukey's multiple comparisons test. (c) CLSM images of JHH7 cells incubated with human specific HMGB1 protein fluorescent probe (green) and DAPI (blue) upon various treatments. ( $n = 3$  biologically independent samples) (d) Quantification of extracellular adenosine triphosphate (ATP) in JHH7 cells upon treatment with PBS, NP1, Comp-NPs in the dark or upon irradiation ( $n = 3$  biologically independent samples). Error bars represent mean  $\pm$  SD. Statistical analysis was performed by one-way ANOVA with a Tukey's multiple comparisons test.

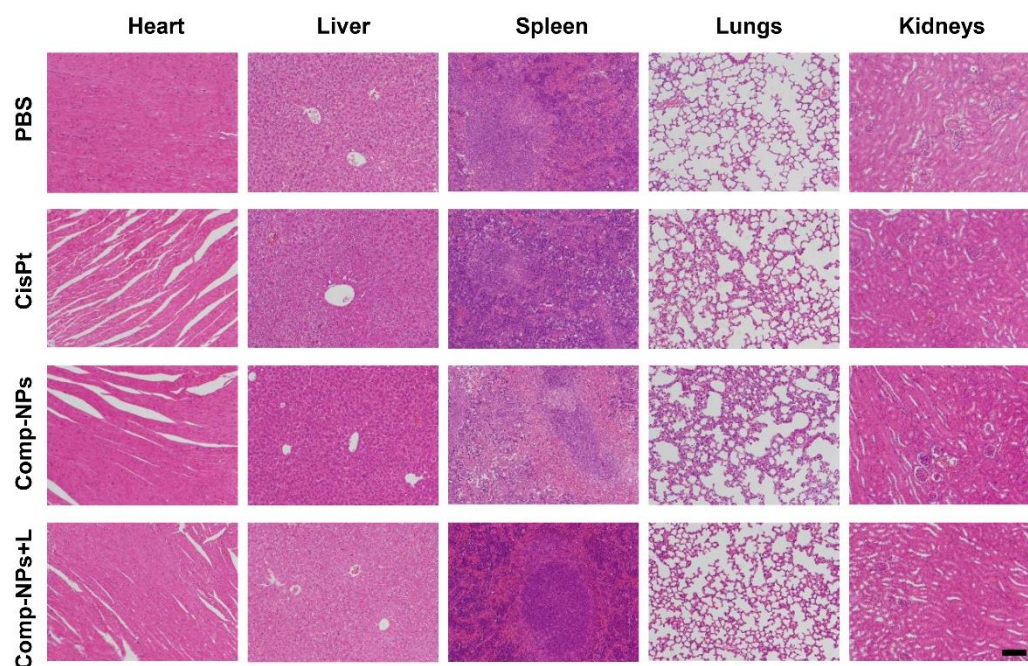

**Supplementary Figure 37.** H&E staining of organs upon various treatments of HCC tumor bearing mice. The experiment was repeated independently 3 times with similar results. scale bar = 100  $\mu\text{m}$ .



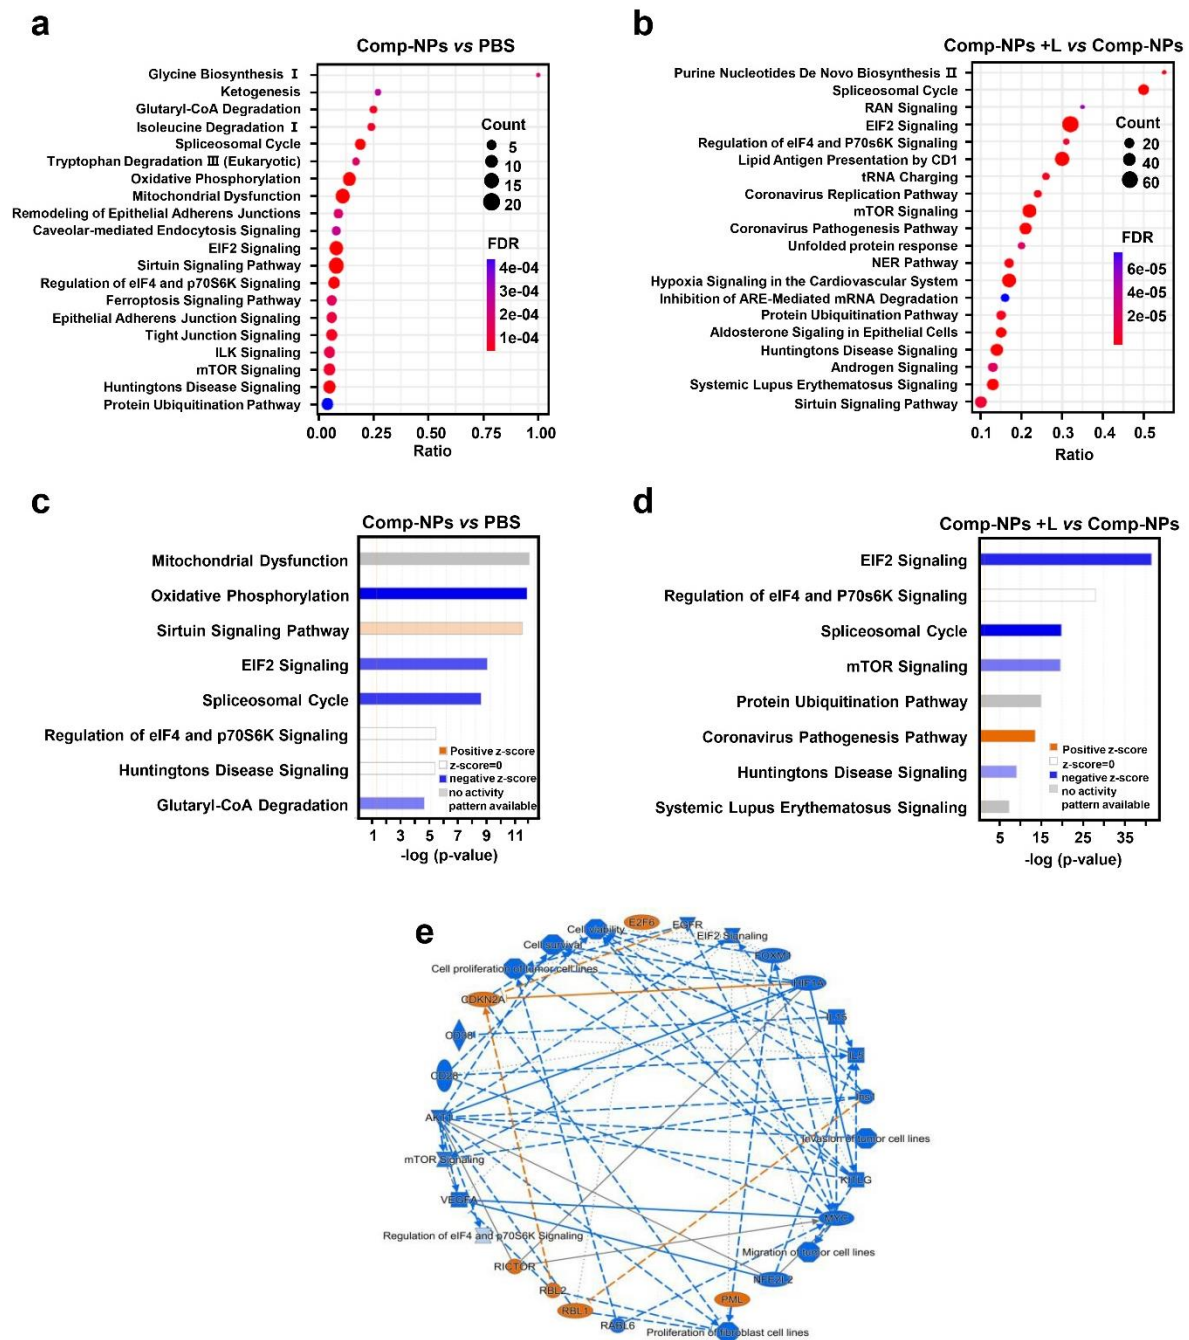

**Supplementary Figure 38.** Proteomic KEGG pathway enrichment analysis upon different treatments. KEGG pathway enrichment analysis upon treatment with (a) PBS and Comp-NPs; (b) Comp-NPs and Comp-NPs exposure to irradiation. Positive and negative correlation of differential pathway analysis upon treatment with (c) PBS and Comp-NPs; (d) Comp-NPs and Comp-NPs exposure to irradiation. (e) Expression of mTOR pathway-related pathways. ( $n = 3$  biologically independent samples)

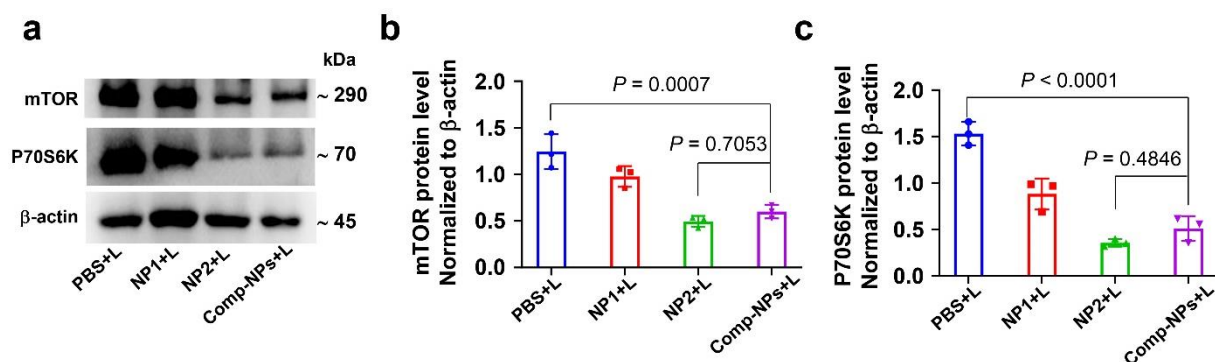

**Supplementary Figure 39.** (a) Western Blot of the mTOR and P70S6K protein expression levels in 4T1 cells after treatment with NP1, NP2, and Comp-NPs upon irradiation (L, 650 nm,  $0.1 \text{ W cm}^{-2}$ ,  $30 \text{ J cm}^{-2}$ , 5 min). (b) mTOR protein expression levels through semiquantitative analysis from the Western Blot in (a) ( $n = 3$  biologically independent cells). Error bars represent mean  $\pm$  SD. Statistical analysis was performed by one-way ANOVA with a Tukey's multiple comparisons test. (c) P70S6K protein expression levels through semiquantitative analysis from the Western Blot in (a) ( $n = 3$  biologically independent cells). Error bars represent mean  $\pm$  SD. Statistical analysis was performed by one-way ANOVA with a Tukey's multiple comparisons test.  $\beta$ -actin was used as a reference.

Full-scale pictures:

$\beta$ -actin (left, anti- $\beta$ -actin antibody, ab8226, 1:1000, Peroxidase-Conjugated Goat Anti-Mouse IgG (H + L), CAT:33201ES60, 1:5000;); P70S6K (middle, anti-P70 S6 Kinase (phosphor T389) antibody, ab2571, 1:1000; Peroxidase-Conjugated Goat Anti-Rabbit IgG (H + L), CAT:33101ES60, 1:5000), mTOR (right, anti-mTOR antibody, ab32028, 1:1000; Peroxidase-Conjugated Goat Anti-Rabbit IgG (H + L), CAT:33101ES60, 1:5000).

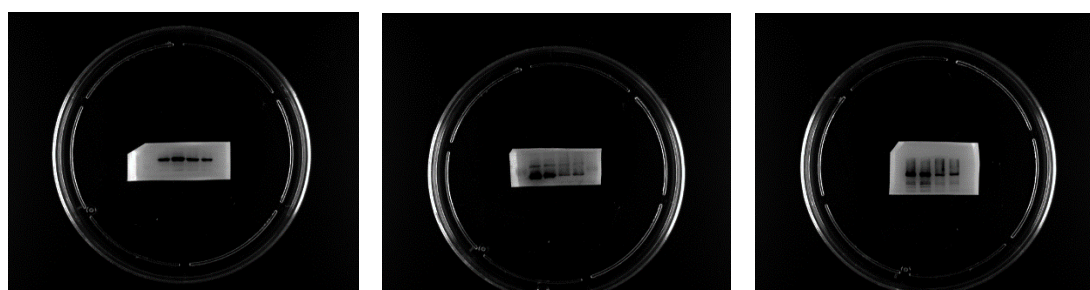

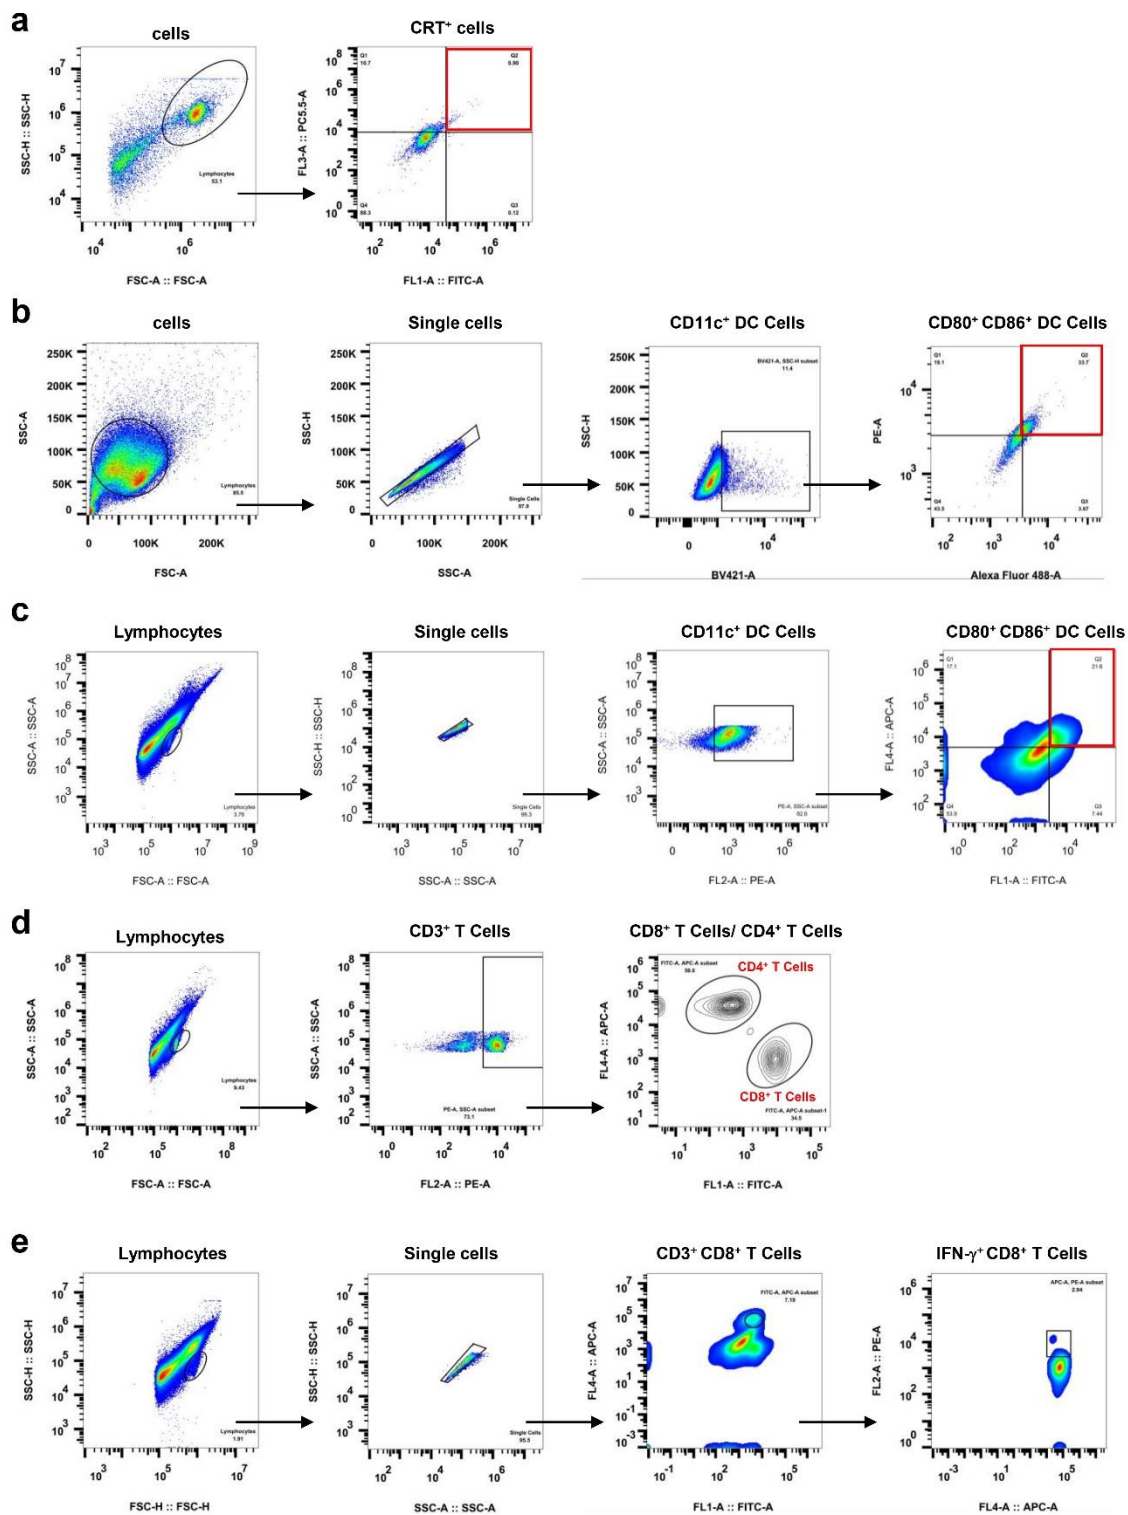

**Supplementary Figure 40.** The gating strategies of flow cytometry analyses for (a) CRT positive cells (related to Figure 3d, Supplementary Figure 36b). (b) Matured DCs in vitro (related to Figure 3i, j, Supplementary Figure 31). (c) Matured DCs in vivo (related to Figure 5c-f, Supplementary Figure 34e, f). (d) CD3<sup>+</sup>CD4<sup>+</sup>CD8<sup>+</sup> T cells (related to Figure 5g, h, Supplementary Figure 34g, h). (e) IFN- $\gamma$ <sup>+</sup> CD8<sup>+</sup> T cells (related to Supplementary Figure 34i, j).



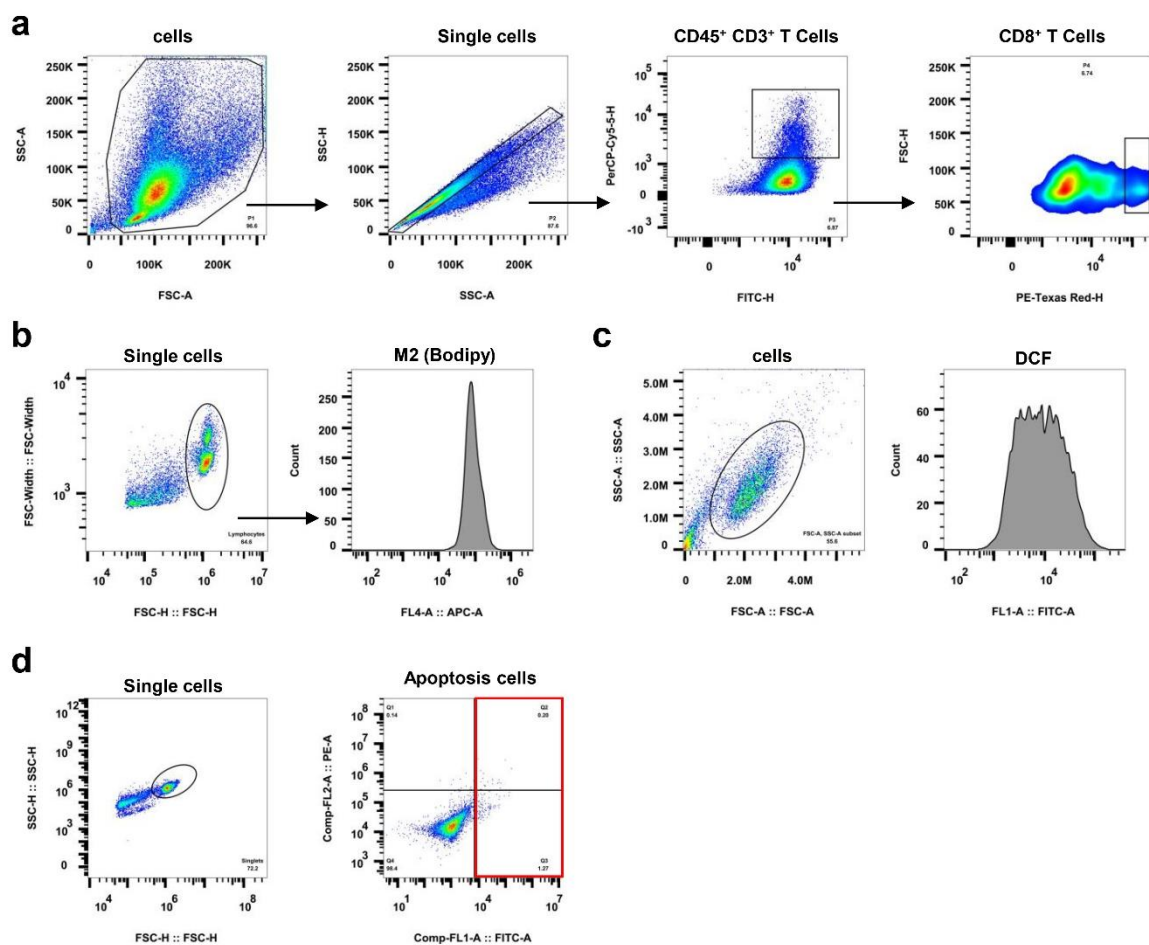

**Supplementary Figure 41.** The gating strategies of flow cytometry analyses for (a) CD3<sup>+</sup>CD8<sup>+</sup> T cells (related to Figure 10d). (b) cellular uptake (related to Supplementary Figure 22a, b). (c) ROS generation (related to Supplementary Figure 23a, b). (d) Apoptosis cells (Supplementary Figure 26).
